1 **A merger between compatible but divergent genomes supports allopolyploidization in**  
2 **the Brassicaceae family**

3

4 **Short title: Intergeneric hybrid genome stabilization**

5

6 Hosub Shin<sup>1,2,†</sup>, Jeong Eun Park<sup>1,†</sup>, Hye Rang Park<sup>1,†</sup>, Woo Lee Choi<sup>1</sup>, Seung Hwa Yu<sup>3</sup>,  
7 Wonjun Koh<sup>1</sup>, Seungill Kim<sup>3</sup>, Hye Yeon Soh<sup>3</sup>, Nomar Espinosa Waminal<sup>1,4</sup>, Hadassah Roa  
8 Belandres<sup>4</sup>, Joo Young Lim<sup>1</sup>, Gibum Yi<sup>1,2</sup>, Jong Hwa Ahn<sup>1</sup>, June-Sik Kim<sup>1,5</sup>, Yong-Min  
9 Kim<sup>6</sup>, Namjin Koo<sup>6</sup>, Kyunghee Kim<sup>1</sup>, Sampath Perumal<sup>1</sup>, Taegu Kang<sup>1</sup>, Junghyo Kim<sup>3</sup>,  
10 Hosung Jang<sup>1,2</sup>, Dong Hyun Kang<sup>1</sup>, Ye Seul Kim<sup>1</sup>, Hyeon-Min Jeong<sup>3</sup>, Junwoo Yang<sup>1</sup>, Somin  
11 Song<sup>1</sup>, Suhyoung Park<sup>7</sup>, Jin A Kim<sup>8</sup>, Yong Pyo Lim<sup>9</sup>, Beom-Seok Park<sup>10</sup>, Tzung-Fu Hsieh<sup>11</sup>,  
12 Tae-Jin Yang<sup>1,2,3,5</sup>, Doil Choi<sup>1,2,3,5</sup>, Hyun Hee Kim<sup>4</sup>, Soo-Seong Lee<sup>12</sup> and Jin Hoe Huh<sup>1,2,3,5\*</sup>

13

14 <sup>1</sup>Department of Agriculture, Forestry and Bioresources, College of Agriculture and Life  
15 Science, Seoul National University, Seoul 08826, South Korea.

16 <sup>2</sup>Plant Genomics and Breeding Institute, Seoul National University, Seoul 08826, South  
17 Korea.

18 <sup>3</sup>Interdisciplinary Program in Agricultural Genomics, Seoul National University, Seoul  
19 08826, South Korea.

20 <sup>4</sup>Chromosome Research Institute, Department of Life Science, Sahmyook University, Seoul  
21 01795, South Korea.

22 <sup>5</sup>Research Institute of Agriculture and Life Science, Seoul National University, Seoul 08826,  
23 South Korea.

24 <sup>6</sup>Korean Bioinformation Center, Korea Research Institute of Bioscience and Biotechnology,  
25 Daejeon 34141, South Korea.

26 <sup>7</sup>Department of Horticultural Crop Research, National Institute of Horticultural and Herbal  
27 Science, Rural Development Administration, Wanju, Jeollabuk-do 55365, South Korea.

28 <sup>8</sup>Department of Agricultural Biotechnology, National Academy of Agricultural Science,  
29 Rural Development, Administration, Jeonju, Jeollabuk-do 54874, South Korea.

30 <sup>9</sup>Department of Horticulture, Chungnam National University, Daejeon 34134, South Korea.

31 <sup>10</sup>Hongik Bio, Pyeongtaek, Gyeonggi-do 17977, South Korea.

32 <sup>11</sup>Plants for Human Health Institute, North Carolina State University, North Carolina  
33 Research Campus, Kannapolis, NC 27695, USA.

34 <sup>12</sup>BioBreeding Institute, Anseong, Gyeonggi-do 17544, South Korea.

35 †These authors contributed equally to this work.

36 \* Author for correspondence: [huhjh@snu.ac.kr](mailto:huhjh@snu.ac.kr)

37

38 The author(s) responsible for distribution of materials integral to the findings presented in  
39 this article in accordance with the policy described in the

40 Instructions for Authors (<https://academic.oup.com/plcell>) is Jin Hoe Huh ([huhjh@snu.ac.kr](mailto:huhjh@snu.ac.kr)).

41

42 **Abstract**

43 Hybridization and polyploidization are pivotal to plant evolution. Genetic crosses between  
44 distantly related species rarely occur in nature mainly due to reproductive barriers but how  
45 such hurdles can be overcome is largely unknown. *xBrassicoraphanus* is a fertile intergeneric  
46 allopolyploid synthesized between *Brassica rapa* and *Raphanus sativus* in the Brassicaceae  
47 family. Genomes of *B. rapa* and *R. sativus* are diverged enough to suppress synapsis  
48 formation between non-homologous progenitor chromosomes during meiosis, and we found  
49 that both genomes reside in the single nucleus of *xBrassicoraphanus* without genome loss or  
50 rearrangement. Expressions of syntenic orthologs identified in *B. rapa* and *R. sativus* were  
51 adjusted to a hybrid nuclear environment of *xBrassicoraphanus*, which necessitates  
52 reconfiguration of transcription network by rewiring *cis-trans* interactions. *B. rapa* coding  
53 sequences have a higher level of gene-body methylation than *R. sativus*, and such  
54 methylation asymmetry is maintained in *xBrassicoraphanus*. *B. rapa*-originated transposable  
55 elements were transcriptionally silenced in *xBrassicoraphanus*, rendered by gain of CHG  
56 methylation *in trans* via small RNAs derived from the same sequences of *R.*  
57 *sativus* subgenome. Our work proposes that not only transcription compatibility but also a  
58 certain extent of genome divergence supports hybrid genome stabilization, which may  
59 explain great diversification and expansion of angiosperms during evolution.

60

## 61 Introduction

62 Genome hybridization and polyploidization have served as major driving forces in  
63 plant evolution (Wendel, 2000; Soltis and Soltis, 2009, 2016; Van de Peer et al., 2017; Cheng  
64 et al., 2018). However, strong hybridization barriers exist in nature to prevent a gene flow  
65 between different species in plants and animals (Abbott et al., 2013). Several mechanisms  
66 have been proposed to explain the postzygotic barriers resulting from genome incompatibility  
67 between distantly related species (Lafon-Placette and Kohler, 2015; Dion-Cote and Barbash,  
68 2017). Among them, a ‘genome shock’ is proposed as one of the critical causes of genome  
69 destabilization upon hybridization, restructuring the hybrid genome through changes of  
70 chromosomal organization or mobilization of transposable elements (TEs) (McClintock,  
71 1984). Another is a ‘transcriptome shock’ that incurs extensive changes of parental gene  
72 expression patterns in the hybrid (Hegarty et al., 2006; Buggs et al., 2011).

73 Despite such negative consequences of hybridization between distantly related  
74 species, novel species can be naturally or artificially produced in a rare occasion while  
75 overcoming the hybridization barrier, the mechanism of which is largely unknown. The  
76 Brassicaceae family contains a variety of agronomically important crop species such as  
77 broccoli, cabbage, cauliflower, oilseed rape, radish and turnip, in addition to a model plant  
78 *Arabidopsis*. The genus *Brassica* is well known for hybridization between different species  
79 within the same genus (interspecific hybridization). For instance, three diploid species  
80 *Brassica rapa* (*Br*; AA), *B. nigra* (BB) and *B. oleracea* (*Bo*; CC) can hybridize each other  
81 generating allotetraploid species *B. napus* (AACC), *B. juncea* (AABB) and *B. carinata*  
82 (BBCC), as epitomized by the model of ‘Triangle of U’ (U, 1935).

83 Hybridization between species in the Brassicaceae family is not restricted to  
84 interspecific hybridization. Since 1826 by Sageret (Oost, 1984), intergeneric hybrids between  
85 *Brassica* and *Raphanus* have been sporadically reported (Karpechenko, 1928; Mcnaughton,  
86 1973; Dolstra, 1982) but failed to survive. Recently developed *xBrassicoraphanus* (*xB*)  
87 (AARR;  $2n = 4x = 38$ ) is an intergeneric allotetraploid between *Br* (AA;  $2n = 2x = 20$ ) and  
88 *Raphanus sativus* (*Rs*) (RR;  $2n = 2x = 18$ ) (Lee et al., 2011). Unlike most newly synthesized  
89 interspecific/intergeneric hybrids, *xB* is self-fertile and genetically stable displaying  
90 phenotypic uniformity in successive generations (Supplemental Figure S1). Genetic and  
91 phenotypic stability of *xB* is very exceptional considering that many allopolyploids often  
92 display a high degree of genome instability and sterility issues, indicating that the  
93 hybridization barrier was overcome immediately after the two genomes have merged.



94 We hypothesized that allopolyploidization events have somewhat ameliorated  
95 deleterious shock phenomena such as genome and transcriptome shocks, and thereby  
96 overcome an intrinsic hybridization barrier between distantly related species. We here report  
97 genome structure, chromosome behaviors, and transcriptome/epigenome profiles of *xB*. We  
98 observed inhibition of meiotic non-homologous interactions, adjustment of homoeologous  
99 gene expressions and gain of DNA methylation. All these likely contribute to genome  
100 stability and transcription network compatibility in *xB*. This study further proposes the  
101 possible mechanisms by which two divergent genomes can successfully merge into a novel  
102 species during evolution of angiosperms.

103

## 104 **Results**

### 105 **Genomic features of *xBrassicoraphanus***

106 *xB* is a fertile and genetically stable intergeneric allotetraploid synthesized from a  
107 cross between *Br* and *Rs*. The *xB* genome was *de novo* assembled using 195.0 Gb of Illumina  
108 shotgun reads (Figure 1A, Table 1 and Supplemental Tables S1 and S2). Flow cytometry  
109 analysis estimated the size of *xB* genome as 998.3 Mb, close to the sum of *Br* (485 Mb) and  
110 *Rs* (510 Mb) genomes (Wang et al., 2011; Jeong et al., 2016) (Supplemental Figure S2). We  
111 assembled 692.8 Mb sequence covering ~70% of the *xB* genome, which contains 87,861  
112 annotated genes and 39.19% (255.8 Mb) of repeat regions with long terminal repeats (LTRs)  
113 being predominant (Supplemental Table S3). The assembled chloroplast genome of *xB*  
114 (153,482 bp) was 99.9% identical to that of *Br* indicating its maternal origin (Supplemental  
115 Figure S3 and Supplemental Table S4). In *xB* genome (692.8 Mb), 335.5 Mb and 343.5 Mb  
116 of scaffolds were assigned to *Br* and *Rs* genomes (referred to as  $A_{Br}$  and  $R_{Rs}$  hereafter),  
117 respectively (Wang et al., 2011; Jeong et al., 2016), comprising two subgenomes of *xB*  
118 (referred to as  $A_{xB}$  and  $R_{xB}$  hereafter) (Table 1 and Supplemental Figure S4). Differentially  
119 expressed genes (DEGs) whose expressions are up- or down-regulated relative to the  
120 progenitors emerge evenly throughout the *xB* genome (Figure 1A). DNA methylation is  
121 predominant in repeat-enriched regions at all CG, CHG and CHH (H = A, T or C) contexts  
122 (Figure 1A and Supplemental Figure S5). Differentially methylated regions (DMRs) refer to  
123 the regions where DNA methylation levels in *xB* are significantly different (absolute  
124 difference > 0.3 for CG, > 0.15 for CHG and > 0.1 for CHH) from those of *Br* and *Rs*, and  
125 about 60.2% of hyper-DMRs are confined to repeat regions (Supplemental Figure S5 and  
126 Supplemental Data Set S1). Approximately 75.8% of H3K9me2 repressive histone marks are

127 also enriched in repeat regions (Figure 1A, Supplemental Figure S6 and Supplemental Data  
128 Set S2). Small RNAs (18-30 nt) are distributed throughout the entire *xB* genome and  
129 significantly associated with DNA methylation (Figure 1A). Cytological observation revealed  
130 a total of 19 chromosome pairs present in *xB* without aneuploidy and/or chromosome  
131 rearrangements (Figure 1B). Previous studies reported that many synthetic allopolyploid  
132 plants such as rapeseed, tobacco and wheat went through massive chromosome  
133 reconstruction leading to transgressive gain or loss of chromosomes and/or aneuploidy over  
134 generations (Xiong et al., 2011; Zhang et al., 2013; Chen et al., 2018; Sosnowska et al.,  
135 2020). However, our findings indicate that *xB* retains both  $A_{Br}$  and  $R_{Rs}$  genomes in the single  
136 nucleus without structural aberrations, but at the same time, experiences substantial changes  
137 in transcriptome and epigenome profiles after hybridization.

138

### 139 **Suppression of homoeologous interactions between A and R chromosomes**

140 Interspecific hybridization often involves extensive homoeologous exchanges during  
141 meiosis eventually causing non-homologous recombination in immediate offspring  
142 (Szadkowski et al., 2010; Szadkowski et al., 2011; Xiong et al., 2011; Zhang et al., 2013;  
143 Grandont et al., 2014; Chen et al., 2018; Sosnowska et al., 2020). To investigate whether  
144 homoeologous interactions occur between  $A_{xB}$  and  $R_{xB}$  chromosomes, we examined the  
145 synapsis formation of meiotic chromosomes by immunolocalization of ASYNAPTIC1  
146 (ASY1) and ZIPPER1 (ZYP1). ASY1 is the axial/lateral element of meiotic chromosomes  
147 loaded onto chromatids before synapsis (Armstrong et al., 2002), and ZYP1 is the central  
148 element of synaptonemal complex present in synapsed chromosomes (Higgins et al., 2005).  
149 We found that ASY1 was correctly loaded onto the entire axis of all euploid and allodiploid  
150 pachytene chromosomes at meiotic prophase I (Figure 2). ZYP1 also co-localized with ASY1  
151 in all euploid pachytene chromosomes (Figure 2). Allodiploid *B. napus* (AC) produced  
152 discontinuous stretches of ZYP1 signals, indicating partial synapsis between A and C  
153 chromosomes (Supplemental Figure S7). Notably, however, ZYP1 was hardly associated  
154 with allodiploid *xB* (AR) pachytene chromosomes (Figure 2), suggesting that crossover  
155 between non-homologous chromosomes was strongly suppressed in *xB* (Park et al., 2020).  
156 These findings demonstrate that *Br* and *R<sub>s</sub>* chromosomes share little structural similarity, and  
157 thus, orthology-dependent homoeologous interactions are prevented during meiosis while  
158 minimizing non-homologous exchanges, which would otherwise lead to aneuploidy and/or

159 chromosome reshuffling. This also supports our observation that both *Br* and *Rs* genomes  
160 exist in entirety without losses in allotetraploid *xB* after hybridization (Figure 1B).

161

### 162 **Homoeologous expression adjustments in *xB***

163 It is assumed that speciation between *Br* and *Rs* has occurred earlier than between *Br*  
164 and *Bo*, although exact speciation timing is controversial (Mitsui et al., 2015; Jeong et al.,  
165 2016; Kim et al., 2018). Pairwise comparison of coding sequences (CDS) of all orthologs  
166 revealed 95.7% of sequence identity between *Br* and *Bo* within the same genus but 91.9% (*Br*  
167 vs. *Rs*) and 92.0% (*Bo* vs. *Rs*) across the genera (Figure 3, A and B). The same analysis in  
168 tribe Camelinae also showed similar sequence divergence for interspecific (93.5% for *A.*  
169 *thaliana* vs. *A. lyrata*) and intergeneric (89.7% for *A. lyrata* vs. *Capsella rubella*, and 90.3%  
170 for *A. thaliana* vs. *C. rubella*) relationships (Figure 3, A and B). Such divergence allowed us  
171 to clearly distinguish *Br*- and *Rs*-originated transcripts in *xB* (Figure 3, A and B). In *xB*  
172 seedling transcriptome, about half of the reads (51.4%) were assigned to  $A_{xB}$  and the other  
173 half to  $R_{xB}$  (48.6%), indicating that both subgenomes equally contribute to *xB* transcriptome  
174 (Supplemental Figure S8A). Similar portions of  $A_{xB}$  and  $R_{xB}$  transcripts were also present in  
175 four different tissues (leaf, hypocotyl, root and flower; Supplemental Figure S8A).

176 Both *Br* and *Rs* genomes are retained, and thus, orthologous pairs become  
177 homoeologous each other in *xB* (Figure 3C). Among 28,751 genes commonly annotated in *Br*  
178 and *xB*, the majority were expressed at similar levels but 2,703 (9.40%) genes differentially  
179 expressed (>2 fold) between *Br* and *xB* seedlings (1,251 up-DEGs and 1,452 down-DEGs in  
180 *xB*; Figure 3, D and E). Differential expression between *Rs* and *xB* was more prominent, with  
181 4,767 (20.96%) from 22,741 *Rs*-derived genes being dissimilarly expressed between *Rs* and  
182 *xB* seedlings (2,395 up-DEGs and 2,372 down-DEGs in *xB*; Figure 3, D and E). In addition,  
183 expression levels of *Br*-originated genes expressed in *Br* and *xB* seedlings were more  
184 positively correlated ( $r = 0.9367$ ) than those of *Rs*-originated genes expressed in *Rs* and *xB*  
185 seedlings ( $r = 0.8403$ ). These findings indicate that the majority of genes retain parental gene  
186 expression levels in *xB*, albeit *Br*-originated genes have a greater tendency to maintain their  
187 parental expression levels than *Rs*-originated genes. In other words, *Br* genome retains  
188 ‘maintenance expression’ over *Rs*, where *Br*-originated expression levels are preferentially  
189 inherited to the *xB* hybrid genome.

190 A total of 15,376 genes were identified as syntenic orthologs between *Br* and *Rs*,  
191 where 5,701 orthologous pairs (37.07%) were differentially expressed (>2 fold) between *Br*

192 and *Rs* seedlings (2,440 up- and 3,261 down-DEGs in *Br* relative to *Rs*; Figure 3F). This  
193 indicates that *Br* and *Rs* have distinct expression profiles for phenotypic divergence. In *xB*  
194 seedlings, however, only 3,655 (23.77%) homoeologous pairs were differentially expressed  
195 (1,553 up- and 2,102 down-DEGs in  $A_{xB}$  relative to  $R_{xB}$ ; Figure 3F). Moreover, expression  
196 levels of  $A_{xB}$  and  $R_{xB}$  homoeologous pairs in *xB* seedlings were more highly correlated ( $r =$   
197 0.8667) than those of  $A_{Br}$  and  $R_{Rs}$  orthologous pairs between *Br* and *Rs* seedlings ( $r = 0.7628$ )  
198 (Figure 3G). This suggests that distinct expressions of many orthologous genes are adjusted  
199 to similar levels in the context of homoeologous relationship in *xB*. Such expression  
200 adjustment was also observed in tissue-specific expression profiles (Supplemental Figure  
201 S8B).

202

### 203 **Reconfiguration of transcription network**

204 Previous studies analyzed the changes of expression levels with the sum of  
205 homoeologous pairs in allopolyploids relative to the parents, and determined additive or non-  
206 additive expressions of duplicated genes (Rapp et al., 2009; Grover et al., 2012; Yoo et al.,  
207 2014; Li et al., 2020; Shan et al., 2020; Wei et al., 2021). In this study, we further  
208 investigated how orthologous pairs were adapted to a new nuclear environment by  
209 monitoring changes of expression patterns of homoeologous genes in *xB* relative to the  
210 progenitors (Figure 4A). Out of 12,150 orthologous/homoeologous pairs commonly  
211 expressed in all *Br*, *Rs* and *xB* seedlings, 7,631 (62.80%) pairs were expressed at similar  
212 levels in every genome context, and their expressions are regarded to be ‘constant’ (gray in  
213 Figure 4A). By contrast, 1,435 (11.81%) pairs showed ‘biased’ expressions with significant  
214 differences between *Br* and *Rs*, while maintaining distinct progenitor expression levels in  
215 subgenomes  $A_{xB}$  and  $R_{xB}$  (blue in Figure 4A). Interestingly, expressions of 1,971 (16.22%)  
216 homoeologous pairs were adjusted to similar levels in *xB*, albeit their expressions were  
217 different between  $A_{Br}$  and  $R_{Rs}$  progenitors (red in Figure 4A). Such ‘convergent’ expressions  
218 were more prominent for  $R_{Rs}$ -originated genes (1,483/1,971). We assumed that ‘convergent’  
219 expressions might result from similar *cis*-regulatory sequences between homoeologous pairs  
220 under the same transcriptional control in *xB*. We analyzed the sequence similarities between  
221 homoeologous gene pairs of the categories of ‘convergent’ vs. ‘biased’ expressions (Figure  
222 4B). Coding sequences of both ‘convergent’ and ‘biased’ homoeologous pairs have a high  
223 level of sequence identities (92.54% vs. 92.00%; Figure 4B). By contrast, the upstream *cis*-  
224 elements are noticeably divergent between homoeologous pairs. Interestingly, ‘convergent’

225 homoeologous pairs share less diverged *cis*-element sequences than ‘biased’ ones (68.42%  
226 vs. 63.29%; Figure 4B). These findings support our hypothesis that the upstream regulatory  
227 sequences of the orthologs have diverged after speciation but retain essential *cis*-elements  
228 that are likely under control of the same *trans*-acting regulators in *xB*. This also suggests that  
229 both A and R genomes still maintain the compatibility in transcription system to prevent a  
230 ‘transcriptome shock’ (Hegarty et al., 2006; Buggs et al., 2011), but divergence in regulatory  
231 elements should entail the reconfiguration of overall expression network in the hybrid  
232 genome of *xB*.

233

### 234 **Coordinated expression of homoeologous genes in response to external stimuli**

235 Gene ontology (GO) enrichment analysis was performed for three categories of  
236 homoeologous expressions – ‘constant’, ‘biased’ and ‘convergent’. ‘Constant’ homoeologous  
237 pairs have enrichment for GO terms such as “cell differentiation”, “developmental cell  
238 growth” and “cell cycle” (Figure 5A and Supplemental Data Set S3), suggesting that cell  
239 function-related genes maintain consistent expression patterns after hybridization. However,  
240 the ‘biased’ homoeologous pairs did not display GO enrichment for specific functions ( $P >$   
241 0.001). Notably, the ‘convergent’ homoeologous pairs had GO enrichment for diverse  
242 responses such as “response to hormone”, “response to stress”, “response to biotic stimulus”  
243 and “response to abiotic stimulus” (Figure 5A and Supplemental Data Set 3). This suggests  
244 that the homoeologous pairs coordinately expressed in response to various stimuli tend to  
245 have similar *cis*-elements, although they are distinctly expressed in the progenitors.  
246 Moreover, the motifs of stress-responsive *cis*-elements such as abscisic acid-responsive  
247 element (ABRE; BACGTGK, B = C, G or T; K = G or T) (Lieberman-Lazarovich et al.,  
248 2019) and dehydration-responsive element/C-repeat element (DRE/CRT; RCCGAC, R = A  
249 or G) (Suzuki et al., 2005) were found abundantly in the upstream sequence of ‘convergent’  
250 homoeologous pairs (Figure. 5B). This indicates that the genes involved in cellular signaling  
251 may require essential *cis*-elements to properly respond to external stimuli.

252 We treated cold to *Br*, *Rs* and *xB* seedlings and monitored expression changes of  
253 orthologous/homoeologous genes. Out of 15,376 orthologs, 1,579 genes were differentially  
254 regulated by cold in *Br* seedlings, with 956 up-DEGs and 623 down-DEGs (Figure 5C). In  
255 cold-treated *Rs* seedlings, 2,378 genes were differentially expressed, with 1,093 up-DEGs  
256 and 1,285 down-DEGs (Figure 5C). Among them, only small fractions of orthologous genes  
257 (182 up- and 91 down-DEGs; 9.75% and 5.01%) were similarly regulated in both *Br* and *Rs*

258 (Figure 5C). In *xB* seedlings, a total of 2,657 genes were differentially regulated by cold  
259 treatment. Specifically, 1,431 *Br*-derived orthologs were differentially expressed (661 up-  
260 DEGs and 770 down-DEGs in  $A_{xB}$ ) and 1,226 *Rs*-derived orthologs differently regulated (562  
261 up-DEGs and 664 down-DEGs in  $R_{xB}$ ) after cold treatment (Figure 5C). Notably, a larger  
262 fraction (261 up- and 378 down-DEGs; 27.13% and 35.80%) of  $A_{xB}$  and  $R_{xB}$  homoeologous  
263 pairs were identified as common DEGs in *xB* (Figure 5C). These observations indicate that  
264 many of orthologous/homoeologous pairs are distinctly regulated in *Br* and *Rs* progenitors  
265 but their expressions are systematically coordinated in *xB* hybrid genome in response to cold  
266 exposure. We also found that expressions of  $A_{Br}$  and  $R_{Rs}$  orthologous genes had a weak  
267 correlation regardless of expression categories (Figure 5D). Interestingly,  $A_{xB}$  and  $R_{xB}$   
268 ‘convergent’ homoeologous pairs had a strong correlation ( $r = 0.620$ ), whereas ‘biased’ ones  
269 did not ( $r = 0.195$ ) (Figure 5E). These data suggest that evolutionarily divergent  
270 homoeologous pairs still share essential motifs in *cis*-elements that can be subjected to the  
271 same *trans*-acting regulation, conceivably responsible for coordinated expressions in  
272 response to environmental cues in hybrids.

273

#### 274 **Silencing of transposable element stabilizes the *xB* hybrid genome**

275 Resynthesized hybrids often experience epigenetic alterations (Greaves et al., 2015).  
276 We investigated methylation profiles in coding genes and repeat regions. In coding regions,  
277 DNA methylation levels are high in gene body, decrease towards 5’ and 3’ shores, and  
278 increase again beyond translation start and termination sites in all *Br*, *Rs* and *xB* seedlings  
279 (Figure 6A). Notably,  $A_{Br}$  and  $R_{Rs}$  progenitor genomes have distinct CG methylation patterns  
280 in coding genes, with  $A_{Br}$  being more densely methylated than  $R_{Rs}$ . This methylation  
281 asymmetry is inherited to  $A_{xB}$  and  $R_{xB}$  subgenomes (Figure 6A). TEs are heavily methylated  
282 in general, especially near-complete CG methylation in all species (Figure 6B). TEs also have  
283 higher CHG and CHH methylation levels than coding genes. Interestingly, *Br* and *Rs* TEs  
284 have distinct CHG methylation profiles, with more CHG methylation at *Rs* TEs (Figure 6B).  
285 However, such asymmetry is abolished in *xB*, where *Br*-derived TEs have an increased CHG  
286 methylation level comparable to *Rs*-derived TEs (Figure 6B). This suggests that TEs from *Br*  
287 acquired more CHG methylation after hybridization possibly via *trans*-acting mechanisms.  
288 We analyzed small RNAs in *Br*, *Rs* and *xB* seedlings, and found that approximately 30~50%  
289 of small RNAs were 24-nt RNAs as potential short-interfering RNAs (siRNAs)  
290 (Supplemental Figure S9A). siRNAs were highly associated with hyper-DMRs in *xB* but



291 loosely with hypo-DMRs, indicating a strong correlation between 24-nt RNA and DNA  
292 methylation (Figure 6C). About 12% of 24-nt RNAs from *Br* and *Rs* have a pairwise  
293 sequence identity and may share the same targets across the genomes (Supplemental Figure  
294 S9B). Indeed, 10.4% of 24-nt RNAs from *xB* also have indistinguishable origins  
295 (Supplemental Figure S9C). This suggests that, in *xB* hybrid genome,  $R_{xB}$ -originated siRNAs  
296 induce gain of CHG methylation at TEs on  $A_{xB}$  possibly via RNA-directed DNA methylation  
297 (RdDM) (Law and Jacobsen, 2010). DNA transposons are widespread throughout the *xB*  
298 genome with little association with DMRs (Figure 6D). LTRs that account for approximately  
299 30% of repeats (Supplemental Table S3) were also heavily methylated. Notably, it was clear  
300 that LTRs on  $A_{xB}$  had higher methylation levels at the CHG context than  $A_{Br}$  (Figure 6D and,  
301 Supplemental Figures S10 and S11). This suggests that DNA methylation profiles have  
302 changed in a subgenome-specific manner, for which  $R_{xB}$ -originated siRNAs might induce  
303 gain of CHG methylation in *trans* at LTRs of the same kind on  $A_{xB}$ . As exemplified in Figure  
304 6E, the *Gypsy* element on  $A_{xB}$  was found to have higher CHG methylation levels than  $A_{Br}$  at  
305 the scaffold level, albeit CG and CHH methylation levels are nearly identical. Northern blot  
306 analysis verified that *Copia* and *Gypsy* elements were moderately expressed in *Br* but  
307 silenced in *xB* seedlings (Figure 6F). These findings suggest that RdDM-mediated DNA  
308 methylation induces TE silencing across subgenomes, which in turn stabilizes the *xB* hybrid  
309 genome.

310

## 311 Discussion

312 Hybridization barriers serve as a mechanism to prevent a gene flow between species  
313 (Abbott et al., 2013). In particular, the post-zygotic hybridization barrier after fertilization is  
314 often manifested as hybrid inviability or sterility (Dion-Cote and Barbash, 2017). Hybrid  
315 sterility is generally associated with a failure in meiosis. Normal meiosis requires the  
316 formation of synapsis between homologous chromosome pairs, but when they are abolished  
317 or formed between multiple and/or non-homologous chromosomes, the chromosomes  
318 segregate abnormally, resulting in sterile gametes and aneuploidy (Martinez-Perez and  
319 Colaiacovo, 2009). Aneuploidy and/or chromosome rearrangements are frequently observed  
320 in resynthesized allopolyploids between close species (Xiong et al., 2011; Zhang et al., 2013;  
321 Chen et al., 2018). This is mainly caused by the collinearity/homology between less divergent  
322 parental chromosomes. For instance, A1/C1, A2/C2 and parts of A5/C4 (A from *Br* and C  
323 from *Bo*) chromosomes are homologous to each other (Parkin et al., 2005), and most

324 phenotypic variations and aneuploidy in resynthesized *B. napus* lines are caused by  
325 homoeologous interactions, mostly between non-homologous chromosomes (Gaeta et al.,  
326 2007; Xiong et al., 2011; Grandont et al., 2014). However, the presence of full complements  
327 of both *Br* and *Rs* chromosomes in *xB* demonstrates that a merger of divergent genomes may  
328 avoid such harmful interactions, while producing fertile gametes after polyploidization.

329 Hybridization between species inevitably entails changes in *cis-trans* interactions  
330 bringing about alterations in the transcription network (Hu and Wendel, 2019). Therefore,  
331 extensive changes in parental expression profiles are expected, and when such changes are  
332 intolerable, the hybrid will undergo a ‘transcriptome shock’, manifested as hybrid dysgenesis  
333 (Martienssen, 2010) or outcrossing depression (Frankham et al., 2011). *xB* experienced  
334 moderate expression changes of progenitor genes after hybridization but still maintains a  
335 transcription network between subgenomes compatible enough to generate novel or  
336 intermediate phenotypes. Our four-point expression analysis revealed that ‘convergent’  
337 homoeologs share similar *cis*-elements, and expression levels of a larger fraction of *Rs*-  
338 derived homoeologs were adjusted to *Br*-derived ones. This suggests that *Br*-originated *trans*-  
339 acting factors probably play dominant roles for co-regulation of homoeologous pairs in *xB*  
340 (Hu and Wendel, 2019). Notably, stress response-related motifs are enriched in the *cis*-  
341 elements of ‘convergent’ homoeologs, suggesting that transcriptional regulation is primarily  
342 mediated by *trans*-acting factors sharing common homoeologous targets that are involved in  
343 diverse responses. Such reconfiguration of transcription network is conceivably crucial to the  
344 adaptation of newly synthesized hybrids.

345 *Br* has higher gene-body CG methylation levels than *Rs*, which is inherited to each  
346 subgenome in *xB*. This indicates that differential gene-body methylation is maintained after  
347 hybridization and this methylation asymmetry may contribute to ‘maintenance expression’ of  
348  $A_{xB}$  through unknown mechanisms. TEs are heavily methylated in general, but also showed  
349 asymmetric CHG methylation between *Br* and *Rs*. Intriguingly, *Br*-originated LTRs gained  
350 CHG methylation comparable to *Rs* ones in *xB*, suggesting that repeat-originated siRNAs  
351 trigger hypermethylation via RdDM in *trans* and TE silencing (Wendel et al., 2016). This  
352 may prevent hyper-activation of TEs and subsequent genome destabilization, which would  
353 otherwise culminate to a ‘genomic shock’ as initially proposed by McClintock (McClintock,  
354 1984).

355 It is believed that the more distantly related the species, the stronger the hybridization  
356 barrier. On the contrary to this assumption, our findings strongly suggest that, as long as the



357 physiology and transcriptional regulatory networks are compatible, a certain extent of  
358 genome divergence promotes hybridization between distant species. Therefore, a trade-off  
359 between genome divergence and transcriptome compatibility is meaningful to facilitate  
360 hybridization between species without causing genome destabilization and/or a conflict in  
361 transcription network. This concept also proposes that interspecific/intergeneric hybridization  
362 may occur more frequently in nature than we have thought, and the model of ‘triangle of U’  
363 (U, 1935) can be further expanded to the intergeneric level.

364         After whole genome duplication or hybridization between the different species  
365 followed by chromosome doubling (allopolyploidization), polyploid plants generally undergo  
366 gradual but substantial genome reconstruction including massive chromosome  
367 rearrangement, differential deletion or retention of duplicated genes and biased genome  
368 fragmentation (Cheng et al., 2018). This eventually leads to a decrease in both chromosome  
369 number and genome size, with most of polyploid properties being lost. Extensive changes in  
370 genome structure and gene repertoire accompanied with sub-functionalization/neo-  
371 functionalization of duplicated genes also contribute to the formation of new species with  
372 novel phenotype and function, which sometimes outperform the diploid progenitors with the  
373 greater ecological fitness. Thus, evolution of land plants, especially the angiosperms, is not a  
374 one-way process. Rather, it is likely to comprise the recurrent cycles of hybridization,  
375 diversification, diploidization and reunification among the species in the same lineage  
376 (Wendel, 2015). Furthermore, understanding the highly dynamic and flexible process of  
377 hybridization and polyploidization should provide a clue to Charles Darwin’s ‘abominable  
378 mystery’ (Darwin, 1903) questioning the great diversification and expansion of angiosperms  
379 within a short geological time.

380

381 **Materials and methods**

382

383 **Plant materials**

384 *xBrassicoraphanus* cv. BB1 (*xB*), *Brassica rapa* L. cv. Chiifu-401-42 (*Br*), and *Raphanus*  
385 *sativus* L. cv. WK10039 (*Rs*) were grown on 1x Murashige and Skoog (MS) medium  
386 (Duchefa) in a growth chamber under 16 hr of fluorescent light at  $20 \pm 10 \mu\text{mol m}^{-2} \text{s}^{-1}$ , 22°C  
387 for 14 days. The seedlings including shoots and roots were harvested together for whole  
388 genome-seq, RNA-seq, bisulfite (BS)-seq, chromatin immunoprecipitation (ChIP)-seq and  
389 small RNA-seq. For tissue-specific transcriptome analysis, RNA was extracted from leaf,  
390 hypocotyl, and root of the seedling and from the opened flower of *Br*, *Rs* and *xB*. For cold  
391 treatment, 14-day-after-sowing seedlings of *Br*, *Rs* and *xB* were grown at 4°C for five weeks.  
392 RNA was extracted and stored at -20°C until use.

393

394 **Genome sequencing, assembly and genome size estimation**

395 Paired-end and mate-pair sequencing libraries with insert sizes of 200 bp, 400 bp, 3 kb, 8 kb  
396 5 kb, 10 kb and 15 kb were constructed using KAPA library prep kit (Roche) and Illumina  
397 Mate Pair Library kit (Illumina) following the manufacturer's instructions (Supplemental  
398 Table S1). The libraries were sequenced on an Illumina HiSeq 2000 platform. Prokaryotic  
399 sequences, duplicated reads, low quality reads and low frequency reads were filtered out  
400 (Supplemental Table S1). The preprocessed sequences were assembled using SOAPdenovo2  
401 (Luo et al., 2015) with the best *k*-mer values for each library. To increase the length of  
402 scaffolds, serial scaffolding processes were carried out using SOAPdenovo2 (Luo et al.,  
403 2015) and SSPACE (Boetzer et al., 2011). Gaps in the scaffolds were reduced further using  
404 SOAPdenovo Gapcloser (Luo et al., 2015) and Platanus (Kajitani et al., 2014) (Supplemental  
405 Table S2). In the *k*-mer analysis, counting *k*-mer occurrence of 19-mer were performed using  
406 Jellyfish (Marcais and Kingsford, 2011). The genome size of *xB* was estimated by flow  
407 cytometry analysis (FACSCalibur, BD Biosciences) as previously described (Huang et al.,  
408 2013). Genome data were visualized with Circos (Krzywinski et al., 2009).

409

410 **Chloroplast genome assembly**

411 The chloroplast genome was *de novo* assembled from the 1x coverage of whole-genome  
412 sequencing reads. The chloroplast genome was annotated with GeSeq (Tillich et al., 2017)

413 and manually curated. The chloroplast genome was visualized using  
414 OrganellarGenomeDRAW (Lohse et al., 2013).

415

#### 416 **Assignment of scaffolds to $A_{xB}$ and $R_{xB}$ subgenomes**

417 Whole-genome sequencing reads of *Rs* and *Br* from Brassica Database (BRAD) were mapped  
418 to the *xB* scaffolds using Bowtie (Langmead et al., 2009). The number of mapped reads was  
419 counted and the scaffolds were assigned to  $A_{xB}$  and  $R_{xB}$  subgenomes, based on a comparison  
420 of the number of parental reads ( $A_{xB}$  subgenome: >99% ratio of mapped reads from *Br*;  $R_{xB}$   
421 subgenome: >99% ratio of mapped reads from *Rs*). Next, assigned *xB* scaffolds were  
422 anchored to the reference chromosomes of *Br* and *Rs* to build *xB* pseudo-chromosomes.

423

#### 424 **Gene and TE annotation**

425 Gene annotations of *xB* and *Rs* were performed following the previous annotation pipeline  
426 with minor modifications (Kim et al., 2014). Briefly, the annotation pipeline consisted of  
427 repeat masking, mapping of different protein sequence sets and mapping of RNA-seq reads.  
428 Independent *ab initio* predictions were performed with AUGUSTUS (Stanke et al., 2008).  
429 The EVIDENCEModeler (Haas et al., 2008) software combines *ab initio* gene predictions with  
430 protein and transcript alignments into weighted consensus gene structures. Gene annotation  
431 of *Br* was downloaded from Ensembl plant ([ftp://ftp.ensemblgenomes.org/pub/plants/release-31/gff3/brassica\\_rapa/](ftp://ftp.ensemblgenomes.org/pub/plants/release-31/gff3/brassica_rapa/)) and additional 1,700 genes were annotated using Exonerate (Slater  
432 and Birney, 2005). Functional annotation was performed through BLASTP against SwissProt  
433 and Plant RefSeq database. TE-related repeat sequences were predicted by RepeatModeler  
434 (Smit and Hubley, 2008) and Repeatmasker (Smit et al., 2015).

435

#### 436 **Fluorescence *in situ* hybridization (FISH) analysis**

437 The sequences of 5S rDNA, 45S rDNA, *RsCent1*, *RsCent2*, *BrCent1*, *BrCent2*, *RsSTRa*,  
438 *RsSTRb*, *BrSTRa*, *BrSTRb* and telomere were used as probes (Supplemental Table S5). The  
439 probes were labelled by nick translation with different fluorochromes. Root mitotic  
440 chromosome spreads and FISH procedures were performed according to the previous method  
441 (Waminal and Kim, 2012). For directly labelled probes, slides were immediately used for  
442 FISH after fixation with 4% paraformaldehyde, without subsequent pepsin and RNase  
443 pretreatment. Images were captured with an Olympus BX53 fluorescence microscope  
444

445 equipped with a Leica DFC365 FS CCD camera and processed using Cytovision ver. 7.2  
446 (Leica Microsystems).

447

#### 448 **Resynthesized allodiploid and allotetraploid x*Brassicoraphanus* plants**

449 Resynthesized allodiploid x*Brassicoraphanus* plants were produced from a cross between *B.*  
450 *rapa* cv. Chiifu-401-42 as the seed parent and *R. sativus* cv. WK10039 as the pollen donor.  
451 Thirty-day-old immature hybrid ovules were cultured on 1 × MS medium supplemented with  
452 2% sucrose (w/v) and 0.8% plant agar (w/v). The plates were placed at 24°C growth chamber  
453 for two weeks and then seedlings were vernalized at 4°C cold chamber for 4 weeks with 16  
454 hr of light and 8 hr of dark.

455

#### 456 **Resynthesized allodiploid and allotetraploid *B. napus* plants**

457 Resynthesized allodiploid *B. napus* plants were produced from a cross between *B. rapa* cv.  
458 Chiifu-401-42 as the seed parent and *B. oleracea* var. Capitata as the pollen donor. Ovary  
459 culture was performed as described in the published protocol with modifications (Inomata,  
460 1977). Ovaries at 4 day after pollination were explanted on 1 × MS medium supplemented  
461 with 5% sucrose (w/v), 300 mg·L<sup>-1</sup> casein hydrolysate and 0.8% plant agar (w/v) at 24°C  
462 growth chamber. Four weeks after explantation, hybrid ovules were transferred on B5  
463 medium with vitamin supplemented with 2% sucrose (w/v), 300 mg·L<sup>-1</sup> casein hydrolysate  
464 and 0.8% plant agar (w/v). Ovules were incubated in the dark at 24°C in three days and  
465 placed at 16 hr of light and 8 hr of dark condition. Seedlings were vernalized at 4°C cold  
466 chamber for 4 weeks with 16 hr of light and 8 hr of dark. The plants were transferred to pots  
467 in the greenhouse with the same light condition. A 0.3% colchicine solution was applied to  
468 the shoot apical meristems for two days to obtain allotetraploids.

469

#### 470 **Production of antibody and immunolocalization of meiotic proteins**

471 The coding regions of *BrASY1* and *BrZYP1* genes were PCR-amplified from cDNA of young  
472 flowering buds from *Br* (Supplemental Table S6). The fragments of *BrASY1* (708 bp) and  
473 *BrZYP1* (1,332 bp) were inserted into the pET-28a expression vector (Novagen) and  
474 transformed into *Escherichia coli* Rosetta2 (DE3) strains (Novagen). The transformed *E. coli*  
475 cells were grown at 30°C in 1 L of Luria-Bertani broth (LB) medium in the presence of 50  
476 µg·mL<sup>-1</sup> of kanamycin and 50 µg·mL<sup>-1</sup> of chloramphenicol until the OD<sub>600</sub> reached to 0.4.  
477 Recombinant protein expression was induced with 1 mM of isopropyl b-D-

478 thiogalactopyranoside (IPTG) at 16°C for 16 hr. Cells were centrifuged (4°C) at 6,500 rpm  
479 for 15 min and the pellet was resuspended in 100 mL of ice-cold column buffer (50 mM Tris-  
480 HCl, pH 7.4, 100 mM NaCl, 10% glycerol, 0.1 mM dithiothreitol, 0.1 mM PMSF). Cells  
481 were lysed by sonication for 5 min on ice (output power, 4; duty cycle, 50%; Branson Sonifer  
482 250, Branson). Inclusion bodies were collected by centrifugation (4°C) at 9,000 rpm for 25  
483 min and dissolved in 4 M urea. The soluble lysate was purified with a 5-mL HisTrap FF  
484 column (GE Health care, USA) with a linear gradient of ice-cold column buffer (50 mM Tris-  
485 HCl, pH 7.4, 100 mM NaCl, 10% glycerol, 0.1 mM dithiothreitol, 250 mM imidazole). The  
486 purified BrASY1 and BrZYP1 proteins were used to produce polyclonal antibodies from  
487 rabbit and rat, respectively, by Youngin Frontier (Korea), and the quality of antibody was  
488 validated by western blot. Immunolocalization was performed as described in the published  
489 protocol (Chelysheva et al., 2013). In brief, primary antibodies anti-BrASY1 and anti-  
490 BrZYP1 were used at dilution 1:250 in PBST (0.1% Triton-X 100 in 1× PBS) containing 1%  
491 BSA and the secondary antibodies (Goat anti-rabbit IgG H&L, Alexa Fluor 488 and Donkey  
492 anti-rat IgG H&L, Alexa Fluor 594) were used at dilution 1:500. Images were captured with  
493 an Axioskop2 microscope equipped with an AxioCam 506 color CCD camera (Zeiss) and  
494 processed using Adobe Photoshop CS6 (Adobe Systems Incorporated).

495

#### 496 **Identification of orthologous and homoeologous gene pairs.**

497 To identify orthologous gene pairs between parental genomes ( $A_{Br}$  vs.  $R_{Rs}$ ), the reciprocal  
498 best BLAST hit was performed with >80% of identity and >80% of coverage. Syntenic  
499 regions were defined as contiguous regions containing at least five homologous gene pairs in  
500 *Br* and *Rs* genomes, and the pairs in the syntenic regions were determined as orthologous  
501 gene pairs. Homoeologous gene pairs between the progenitor genomes ( $A_{xB}$  vs.  $R_{xB}$ ) were  
502 determined following the same standard.

503

#### 504 **RNA-seq analysis**

505 Total RNA was extracted with RNeasy plant kit (Qiagen) following the manufacture's  
506 protocol. The DNase-treated RNA samples, including two replicates for each of seedling,  
507 leaf, hypocotyl and flower, and one replicate for root of *xB* and its progenitors, were used for  
508 constructing RNA-seq libraries (Zhong et al., 2011). RNA sequencing was performed on an  
509 Illumina HiSeq 2000 platform. The obtained raw reads were filtered using FASTX-Toolkit  
510 and low quality reads ( $Q < 20$ ) were removed. The filtered reads were mapped on *Br*, *Rs* and

511 *xB* genomes using Tophat (Trapnell et al., 2009) with default parameters (Supplemental Data  
512 Set S4). The mapped read counts were calculated using HTSeq (Anders et al., 2015).  
513 Statistical tests of DEGs were performed using EdgeR (Robinson et al., 2010) with the false  
514 discovery rate (FDR) < 0.05 and fragments per kilobase of transcript per million mapped  
515 reads (FPKM)  $\log_2$  fold change > 1. The Gene ontology (GO) terms of *xB* genome were  
516 annotated by Blast2Go using the non-redundant sequence database from NCBI with <  $1e^{-15}$  of  
517 e-value parameter. The statistical comparison of GO term accumulation was conducted using  
518 TopGo in R package (Alexa and Rahnenfuhrer, 2010) with p-values of fisher's exact test ( $P <$   
519 0.001). Motifs of ABRE (BACGTGK, B = C, G or T; K = G or T) and DRE/CRT  
520 (RCCGAC, R = A or G) were searched in 500 bp upstream regions of genes using FIMO  
521 (Grant et al., 2011) with parameters "--verbosity 1 --thresh 0.01".

522

### 523 **BS-seq analysis**

524 Genomic DNA (5  $\mu$ g) was used to construct the BS-seq library with the KAPA Library kit  
525 (Roche) and EpiTect Bisulfite Kit (Qiagen) according to manufacturer's instructions. The  
526 libraries were sequenced using the Illumina HiSeq 2000. Raw reads were filtered using  
527 FASTX-Toolkit and low quality reads ( $Q < 20$ ) were removed. Reads were mapped onto the  
528 *xB* genome using BISON (Ryan and Ehninger, 2014), with the parameters "--very-sensitive --  
529 score-min 'L,-0.6,-0.6'". Only cytosine sites with 4x coverage read depths were accepted for  
530 the subsequent analysis. Differentially methylated cytosines (DMCs) and regions (DMRs)  
531 were identified as described previously (Kim et al., 2019). In brief, DMCs were identified  
532 using Fisher's exact test ( $P < 0.05$ ) between the levels of methylation in *xB* and the  
533 progenitors *Br* and *Rs*. DMRs were identified based on the regions with a length  $\geq 200$  bp,  $\geq$   
534 5 DMCs, and the mean methylation difference  $\geq 0.3$  for CG,  $\geq 0.15$  for CHG, and  $\geq 0.1$  for  
535 CHH (Supplemental Data Set S1). For metagene plot of DNA methylation in gene bodies and  
536 repeat, regions of 2 kb upstream, downstream and gene body were divided into 50 bp  
537 windows and methylation levels were calculated each. Methylation data were visualized with  
538 the Integrated Genome Browser (Freese et al., 2016).

539

### 540 **ChIP-seq analysis**

541 ChIP was performed following the published protocol (Lee et al., 2007). Chromatin was  
542 immunoprecipitated with antibody against histone H3K9me2 (Abcam). ChIP-seq libraries  
543 were constructed as described in the Illumina ChIP sequencing kit (Illumina). DNA



544 fragments with about 600 bp were excised from an agarose gel and amplified for cluster  
545 generation and sequencing. All DNA libraries were sequenced on a HiSeq2500 platform  
546 (Illumina) with single-end reads. The sequencing reads were quality-controlled with FASTX-  
547 Toolkit and aligned to *xB* genome using Bowtie (Langmead et al., 2009) with parameters “-  
548 best -m1”. H3K9me2-enriched regions were defined using SICER (Zang et al., 2009)  
549 (window size = 500, gap size = 600, FDR = 0.01) and overlapping regions between two  
550 biological replicates were identified using the MergePeaks module of the Homer software  
551 (Heinz et al., 2010) (Supplemental Data Set S2).

552

### 553 **Small RNA-seq analysis**

554 The small RNA libraries were constructed using the Illumina TruSeq Small RNA sample  
555 Prep kit (Illumina). The libraries were sequenced on the HiSeq 2000 platform (Illumina). The  
556 adaptor sequences were trimmed using cutadapt (Martin, 2011) with parameters “-g  
557 TACAGTCCGACGATC -a TGGAATTCTCGGGTGCCAAGG -m 18 -M 30”. Low quality  
558 sequences were removed using FASTX-Toolkit with parameters “-q 20 -p 100”. The quality-  
559 trimmed read sequences ranged from 18 to 30-nt were mapped to the *xB* genome using  
560 Bowtie (Langmead et al., 2009) with parameters “-best -v 0”. Mapped reads were classified  
561 into ribosomal RNA, small nucleolar RNA, small nuclear RNA, signal recognition particle  
562 RNA, and transfer RNA using Rfam database version 12.1 (Nawrocki et al., 2014).  
563 Prediction of microRNA (miRNA) was performed with the miRDeep-P (Yang and Li, 2011)  
564 and ShortStack (Axtell, 2013), and the secondary structure was predicted using RNAfold.  
565 Candidate miRNAs were annotated by alignment to miRBase database version 21 (Kozomara  
566 and Griffiths-Jones, 2013).

567

### 568 **Northern blot analysis**

569 Total RNA (10 µg) was electrophoresed on a 1% formaldehyde denaturing gel and  
570 transferred onto the Hybond N+ membrane (GE Healthcare). The *BrGypsy*, *BrCopia* and  
571 *Actin* probes were amplified by PCR, and randomly labelled with [ $\alpha$ -<sup>32</sup>P]dCTP (Perkin  
572 Elmer) using a Klenow fragment (3' → 5' exo-) (New England Biolabs). Hybridization was  
573 performed at 65°C overnight in the pre-hybridization solution containing 6x saline-sodium  
574 citrate buffer, 5x Denhardt's reagent, and 1% sodium dodecyl sulphate. After hybridization,  
575 the membrane was washed and exposed to an X-ray film (Fujifilm). Primer sequences are  
576 provided in Supplemental Table S7.

577

578 **Accession numbers**

579 The sequencing data for genomic, transcriptomic and epigenomic analyses are available from  
580 Bioproject ID PRJNA353741, PRJNA353738, PRJNA394950 and PRJNA353316. The  
581 assembled *xBrassicoraphanus* genome is available from Bioproject ID PRJNA353741. The  
582 chloroplast genome of *xB* is deposited to GenBank under accession number MN928713.

583

584 **Supplemental data**

585 Supplemental Figure S1. Phenotypes of *xBrassicoraphanus* intermediate between *B. rapa*  
586 and *R. sativus*.

587 Supplemental Figure S2. Flow cytometry analysis and genome size estimation of  
588 *xBrassicoraphanus*.

589 Supplemental Figure S3. Chloroplast genome of *xBrassicoraphanus*.

590 Supplemental Figure S4. Comparison of *xBrassicoraphanus* genome with its parental  
591 genomes.

592 Supplemental Figure S5. Genome-wide DNA methylation in *xBrassicoraphanus*.

593 Supplemental Figure S6. H3K9me2 modification of *xBrassicoraphanus*.

594 Supplemental Figure S7. Chromosome interactions in resynthesized *xBrassicoraphanus* and  
595 *Brassica napus*.

596 Supplemental Figure S8. Transcriptome analysis of *xBrassicoraphanus*.

597 Supplemental Figure S9. Small RNA analysis of *xBrassicoraphanus*.

598 Supplemental Figure S10. DNA methylation metaplots in transposable elements.

599 Supplemental Figure S11. Distribution of DNA methylation changes in A and R subgenomes  
600 of *xBrassicoraphanus*.

601 Supplemental Table S1. Summary of genomic reads from *xBrassicoraphanus*.

602 Supplemental Table S2. Statistics of *xBrassicoraphanus* genome assembly.

603 Supplemental Table S3. Annotation of repeat sequences in *xBrassicoraphanus* genome.

604 Supplemental Table S4. Chloroplast genome annotations of *xBrassicoraphanus* and  
605 progenitors.

606 Supplemental Table S5. Primers and oligo for FISH probes.

607 Supplemental Table S6. Primers for production of antibody.



608 Supplemental Table S7. Primers for northern blot probes.  
609 Supplemental Data Set S1. Detected differentially methylated regions in *xBrassicoraphanus*.  
610 Supplemental Data Set S2. Histone H3K9me2 peak regions in *B. rapa*, *R. sativus* and  
611 *xBrassicoraphanus*.  
612 Supplemental Data Set S3. Gene ontology analysis of homoeologous gene pairs showing  
613 biased, convergent and constant expression.  
614 Supplemental Data Set S4. Number of read pairs mapped on *B. rapa*, *R. sativus*, and  
615 *xBrassicoraphanus* genomes.  
616

617 **Acknowledgments**

618 Mary Gehring at Whitehead Institute, MIT commented on the manuscript. This work is  
619 dedicated to late Dr. Woo Jang-Choon (1898–1959), also known as Nagaharu U in Japanese,  
620 for his 60th memorial anniversary.

621

622 **Funding**

623 This work was supported by the Next-Generation BioGreen 21 Program (PJ013262) and the  
624 National Agricultural Genome Program (PJ013440) by Rural Development Administration  
625 (RDA), Republic of Korea.

626

627 **Author contributions**

628 J.H.H. conceived the project. H.S., J.E.P., H.R.P. and J.H.H. designed the study. H.S., J.E.P.,  
629 W.L.C., H.Y.S. and G.Y. performed molecular biology experiments and analyzed the data.  
630 J.E.P. performed FACS analysis. H.R.P. and W.K. performed immunolocalization  
631 experiments. H.S., S.H.Y., S.K., J.H.A. and J.-S.K. performed bioinformatics analysis.  
632 N.E.W., H.R.B. and S.Perumal performed FISH analysis. Y.-M.K. and N.K. performed  
633 annotation analysis. K.K. and T.-J.Y. analyzed chloroplast genomes. S.Park, J.A.K., Y.P.L.  
634 and S.-S.L. provided plant materials. H.S., J.E.P., H.R.P., W.L.C., S.H.Y., W.K., H.Y.S.,  
635 J.Y.L., G.Y., T.K., J.K., H.J., D.H.K., Y.S.K., H.-M.J., J.Y. and S.S. prepared plant materials.  
636 W.L.C., S.W.Y., J.Y.L., B.-S.P., T.-F.H., T.-J.Y., D.C., H.H.K. and S.-S.L. commented on  
637 the manuscript. H.S., J.E.P., H.R.P. and J.H.H. wrote the manuscript with help from all co-  
638 authors.

639

640 *Conflict of interest statement.* None declared.

641

642 **References**

- 643 **Abbott, R., Albach, D., Ansell, S., Arntzen, J.W., Baird, S.J.E., Bierne, N., Boughman,**  
644 **J.W., Brelsford, A., Buerkle, C.A., Buggs, R., Butlin, R.K., Dieckmann, U.,**  
645 **Eroukhmanoff, F., Grill, A., Cahan, S.H., Hermansen, J.S., Hewitt, G., Hudson,**  
646 **A.G., Jiggins, C., Jones, J., Keller, B., Marczewski, T., Mallet, J., Martinez-**  
647 **Rodriguez, P., Most, M., Mullen, S., Nichols, R., Nolte, A.W., Parisod, C.,**  
648 **Pfennig, K., Rice, A.M., Ritchie, M.G., Seifert, B., Smadja, C.M., Stelkens, R.,**  
649 **Szymura, J.M., Vainola, R., Wolf, J.B.W., Zinner, D. (2013) Hybridization and**  
650 **speciation. J Evol Biol 26: 229-246**
- 651 **Alexa, A., Rahnenfuhrer, J. (2010) topGO: enrichment analysis for gene ontology. R**  
652 **package version 2**
- 653 **Anders, S., Pyl, P.T., Huber, W. (2015) HTSeq-a Python framework to work with high-**  
654 **throughput sequencing data. Bioinformatics 31: 166-169**
- 655 **Armstrong, S.J., Caryl, A.P., Jones, G.H., Franklin, F.C. (2002) Asy1, a protein required**  
656 **for meiotic chromosome synapsis, localizes to axis-associated chromatin in**  
657 ***Arabidopsis* and *Brassica*. J Cell Sci 115: 3645-3655**
- 658 **Axtell, M.J. (2013) ShortStack: comprehensive annotation and quantification of small RNA**  
659 **genes. RNA 19: 740-751**
- 660 **Boetzer, M., Henkel, C.V., Jansen, H.J., Butler, D., Pirovano, W. (2011) Scaffolding pre-**  
661 **assembled contigs using SSPACE. Bioinformatics 27: 578-579**
- 662 **Buggs, R.J.A., Zhang, L.J., Miles, N., Tate, J.A., Gao, L., Wei, W., Schnable, P.S.,**  
663 **Barbazuk, W.B., Soltis, P.S., Soltis, D.E. (2011) Transcriptomic shock generates**  
664 **evolutionary novelty in a newly formed, natural allopolyploid plant. Curr Biol 21:**  
665 **551-556**
- 666 **Chelysheva, L.A., Grandont, L., Grelon, M. (2013) Immunolocalization of meiotic**  
667 **proteins in Brassicaceae: method 1. Methods Mol Biol 990: 93-101**
- 668 **Chen, S., Ren, F., Zhang, L., Liu, Y., Chen, X., Li, Y., Zhang, L., Zhu, B., Zeng, P., Li,**  
669 **Z., Larkin, R.M., Kuang, H. (2018) Unstable allotetraploid tobacco genome due to**  
670 **frequent homeologous recombination, segmental deletion, and chromosome loss. Mol**  
671 **Plant 11: 914-927**
- 672 **Cheng, F., Wu, J., Cai, X., Liang, J.L., Freeling, M., Wang, X.W. (2018) Gene retention,**  
673 **fractionation and subgenome differences in polyploid plants. Nat Plants 4: 258-268**

- 674 **Darwin, C.** (1903) More letters of Charles Darwin: a record of his work in a series of  
675 hitherto unpublished letters (D. Appleton)
- 676 **Dion-Cote, A.M., Barbash, D.A.** (2017) Beyond speciation genes: an overview of genome  
677 stability in evolution and speciation. *Curr Opin Genet Dev* **47**: 17-23
- 678 **Dolstra, O.** (1982) Synthesis and fertility of *Brassicoraphanus* and ways of transferring  
679 *Raphanus* characters to *Brassica* (Pudoc)
- 680 **Frankham, R., Ballou, J.D., Eldridge, M.D., Lacy, R.C., Ralls, K., Dudash, M.R.,**  
681 **Fenster, C.B.** (2011) Predicting the probability of outbreeding depression. *Conserv*  
682 *Biol* **25**: 465-475
- 683 **Freese, N.H., Norris, D.C., Loraine, A.E.** (2016) Integrated genome browser: visual  
684 analytics platform for genomics. *Bioinformatics* **32**: 2089-2095
- 685 **Gaeta, R.T., Pires, J.C., Iniguez-Luy, F., Leon, E., Osborn, T.C.** (2007) Genomic changes  
686 in resynthesized *Brassica napus* and their effect on gene expression and phenotype.  
687 *Plant Cell* **19**: 3403-3417
- 688 **Grandont, L., Cunado, N., Coriton, O., Huteau, V., Eber, F., Chevre, A.M., Grelon, M.,**  
689 **Chelysheva, L., Jenczewski, E.** (2014) Homoeologous chromosome sorting and  
690 progression of meiotic recombination in *Brassica napus*: ploidy does matter! *Plant*  
691 *Cell* **26**: 1448-1463
- 692 **Grant, C.E., Bailey, T.L., Noble, W.S.** (2011) FIMO: scanning for occurrences of a given  
693 motif. *Bioinformatics* **27**: 1017-1018
- 694 **Greaves, I.K., Gonzalez-Bayon, R., Wang, L., Zhu, A., Liu, P.C., Groszmann, M.,**  
695 **Peacock, W.J., Dennis, E.S.** (2015) Epigenetic changes in hybrids. *Plant Physiol*  
696 **168**: 1197-1205
- 697 **Grover, C.E., Gallagher, J.P., Szadkowski, E.P., Yoo, M.J., Flagel, L.E., Wendel, J.F.**  
698 (2012) Homoeolog expression bias and expression level dominance in allopolyploids.  
699 *New Phytol* **196**: 966-971
- 700 **Haas, B.J., Salzberg, S.L., Zhu, W., Pertea, M., Allen, J.E., Orvis, J., White, O., Buell,**  
701 **C.R., Wortman, J.R.** (2008) Automated eukaryotic gene structure annotation using  
702 EVIDENCEModeler and the program to assemble spliced alignments. *Genome Biol* **9**:  
703 R7
- 704 **Hegarty, M.J., Barker, G.L., Wilson, I.D., Abbott, R.J., Edwards, K.J., Hiscock, S.J.**  
705 (2006) Transcriptome shock after interspecific hybridization in *Senecio* is ameliorated  
706 by genome duplication. *Curr Biol* **16**: 1652-1659

- 707 **Heinz, S., Benner, C., Spann, N., Bertolino, E., Lin, Y.C., Laslo, P., Cheng, J.X., Murre,**  
708 **C., Singh, H., Glass, C.K.** (2010) Simple combinations of lineage-determining  
709 transcription factors prime *cis*-regulatory elements required for macrophage and B  
710 cell identities. *Mol Cell* **38**: 576-589
- 711 **Higgins, J.D., Sanchez-Moran, E., Armstrong, S.J., Jones, G.H., Franklin, F.C.** (2005)  
712 The *Arabidopsis* synaptonemal complex protein ZYP1 is required for chromosome  
713 synapsis and normal fidelity of crossing over. *Genes Dev* **19**: 2488-2500
- 714 **Hu, G., Wendel, J.F.** (2019) *Cis-trans* controls and regulatory novelty accompanying  
715 allopolyploidization. *New Phytol* **221**: 1691-1700
- 716 **Huang, H., Tong, Y., Zhang, Q.J., Gao, L.Z.** (2013) Genome size variation among and  
717 within *Camellia* species by using flow cytometric analysis. *Plos One* **8**: e64981
- 718 **Inomata, N.** (1977) Production of interspecific hybrids between *Brassica campestris* and  
719 *Brassica oleracea* by culture in vitro of excised ovaries: I. Effects of yeast extract and  
720 casein hydrolysate on the development of excised ovaries. *Jpn J Breed* **27**: 295-304
- 721 **Jeong, Y.M., Kim, N., Ahn, B.O., Oh, M., Chung, W.H., Chung, H., Jeong, S., Lim,**  
722 **K.B., Hwang, Y.J., Kim, G.B., Baek, S., Choi, S.B., Hyung, D.J., Lee, S.W., Sohn,**  
723 **S.H., Kwon, S.J., Jin, M., Seol, Y.J., Chae, W.B., Choi, K.J., Park, B.S., Yu, H.J.,**  
724 **Mun, J.H.** (2016) Elucidating the triplicated ancestral genome structure of radish  
725 based on chromosome-level comparison with the *Brassica* genomes. *Theor Appl*  
726 *Genet* **129**: 1357-1372
- 727 **Kajitani, R., Toshimoto, K., Noguchi, H., Toyoda, A., Ogura, Y., Okuno, M., Yabana,**  
728 **M., Harada, M., Nagayasu, E., Maruyama, H., Kohara, Y., Fujiyama, A.,**  
729 **Hayashi, T., Itoh, T.** (2014) Efficient *de novo* assembly of highly heterozygous  
730 genomes from whole-genome shotgun short reads. *Genome Res* **24**: 1384-1395
- 731 **Karpechenko, G.D.** (1928) Polyploid hybrids of *Raphanus sativus* L. x *Brassica oleracea* L.  
732 *Mol Gen Genet* **48**: 1-85
- 733 **Kim, C.K., Seol, Y.J., Perumal, S., Lee, J., Waminal, N.E., Jayakodi, M., Lee, S.C., Jin,**  
734 **S., Choi, B.S., Yu, Y., Ko, H.C., Choi, J.W., Ryu, K.Y., Sohn, S.H., Parkin, I.,**  
735 **Yang, T.J.** (2018) Re-exploration of U's triangle *Brassica* species based on  
736 chloroplast genomes and 45S nrDNA sequences. *Sci Rep* **8**: 1-11
- 737 **Kim, J.S., Lim, J.Y., Shin, H., Kim, B.G., Yoo, S.D., Kim, W.T., Huh, J.H.** (2019) ROS1-  
738 dependent DNA demethylation is required for ABA-inducible *NIC3* expression. *Plant*  
739 *Physiol* **179**: 1810-1821

- 740 **Kim, S., Park, M., Yeom, S.I., Kim, Y.M., Lee, J.M., Lee, H.A., Seo, E., Choi, J.,**  
741 **Cheong, K., Kim, K.T., Jung, K., Lee, G.W., Oh, S.K., Bae, C., Kim, S.B., Lee,**  
742 **H.Y., Kim, S.Y., Kim, M.S., Kang, B.C., Jo, Y.D., Yang, H.B., Jeong, H.J., Kang,**  
743 **W.H., Kwon, J.K., Shin, C., Lim, J.Y., Park, J.H., Huh, J.H., Kim, J.S., Kim,**  
744 **B.D., Cohen, O., Paran, I., Suh, M.C., Lee, S.B., Kim, Y.K., Shin, Y., Noh, S.J.,**  
745 **Park, J., Seo, Y.S., Kwon, S.Y., Kim, H.A., Park, J.M., Kim, H.J., Choi, S.B.,**  
746 **Bosland, P.W., Reeves, G., Jo, S.H., Lee, B.W., Cho, H.T., Choi, H.S., Lee, M.S.,**  
747 **Yu, Y., Do Choi, Y., Park, B.S., van Deynze, A., Ashrafi, H., Hill, T., Kim, W.T.,**  
748 **Pai, H.S., Ahn, H.K., Yeam, I., Giovannoni, J.J., Rose, J.K.C., Sorensen, I., Lee,**  
749 **S.J., Kim, R.W., Choi, I.Y., Choi, B.S., Lim, J.S., Lee, Y.H., Choi, D. (2014)**  
750 **Genome sequence of the hot pepper provides insights into the evolution of pungency**  
751 **in *Capsicum* species. Nat Genet 46: 270**
- 752 **Kozomara, A., Griffiths-Jones, S. (2013) miRBase: annotating high confidence microRNAs**  
753 **using deep sequencing data. Nucleic Acids Res 42: D68-D73**
- 754 **Krzywinski, M., Schein, J., Birol, I., Connors, J., Gascoyne, R., Horsman, D., Jones,**  
755 **S.J., Marra, M.A. (2009) Circos: an information aesthetic for comparative genomics.**  
756 **Genome Res 19: 1639-1645**
- 757 **Langmead, B., Trapnell, C., Pop, M., Salzberg, S.L. (2009) Ultrafast and memory-efficient**  
758 **alignment of short DNA sequences to the human genome. Genome Biol 10: R25.**
- 759 **Law, J.A., Jacobsen, S.E. (2010) Establishing, maintaining and modifying DNA**  
760 **methylation patterns in plants and animals. Nat Rev Genet 11: 204-220**
- 761 **Lafon-Placette, C., Kohler, C. (2015) Epigenetic mechanisms of postzygotic reproductive**  
762 **isolation in plants. Curr Opin Plant Biol 23: 39-44**
- 763 **Lee, J., He, K., Stolc, V., Lee, H., Figueroa, P., Gao, Y., Tongprasit, W., Zhao, H., Lee,**  
764 **I., Deng, X.W. (2007) Analysis of transcription factor HY5 genomic binding sites**  
765 **revealed its hierarchical role in light regulation of development. Plant Cell 19: 731-**  
766 **749**
- 767 **Lee, S.-S., Lee, S.-A., Yang, J., Kim, J. (2011) Developing stable progenies of**  
768 **×*Brassicoraphanus*, an intergeneric allopolyploid between *Brassica rapa* and**  
769 ***Raphanus sativus*, through induced mutation using microspore culture. Theor Appl**  
770 **Genet 122: 885-891**

- 771 **Li, M., Wang, R., Wu, X., Wang, J.** (2020) Homoeolog expression bias and expression  
772 level dominance (ELD) in four tissues of natural allotetraploid *Brassica napus*. BMC  
773 Genomics **21**: 330
- 774 **Lieberman-Lazarovich, M., Yahav, C., Israeli, A., Efroni, I.** (2019) Deep conservation of  
775 cis-element variants regulating plant hormonal responses. Plant Cell **31**: 2559-2572
- 776 **Lohse, M., Drechsel, O., Kahlau, S., Bock, R.** (2013) OrganellarGenomeDRAW-a suite of  
777 tools for generating physical maps of plastid and mitochondrial genomes and  
778 visualizing expression data sets. Nucleic Acids Res **41**: W575-W581
- 779 **Luo, R., Liu, B., Xie, Y., Li, Z., Huang, W., Yuan, J., He, G., Chen, Y., Pan, Q., Liu, Y.**  
780 (2015) SOAPdenovo2: an empirically improved memory-efficient short-read *de novo*  
781 assembler. GigaScience **4**: s13742-13015-10069-13742
- 782 **Marcais, G., Kingsford, C.** (2011) A fast, lock-free approach for efficient parallel counting  
783 of occurrences of k-mers. Bioinformatics **27**: 764-770
- 784 **Martienssen, R.A.** (2010) Heterochromatin, small RNA and post-fertilization dysgenesis in  
785 allopolyploid and interploid hybrids of *Arabidopsis*. New Phytol **186**: 46-53
- 786 **Martin, M.** (2011) Cutadapt removes adapter sequences from high-throughput sequencing  
787 reads. EMBnet.journal **17**: 10-12
- 788 **Martinez-Perez, E., Colaiacovo, M.P.** (2009) Distribution of meiotic recombination events:  
789 talking to your neighbors. Curr Opin Genet Dev **19**: 105-112
- 790 **McClintock, B.** (1984) The significance of responses of the genome to challenge. Science  
791 **226**: 792-801
- 792 **Mcnaughton, I.H.** (1973) Synthesis and Sterility of *Raphanobrassica*. Euphytica **22**: 70-88
- 793 **Mitsui, Y., Shimomura, M., Komatsu, K., Namiki, N., Shibata-Hatta, M., Imai, M.,**  
794 **Katayose, Y., Mukai, Y., Kanamori, H., Kurita, K., Kagami, T., Wakatsuki, A.,**  
795 **Ohyanagi, H., Ikawa, H., Minaka, N., Nakagawa, K., Shiwa, Y., Sasaki, T.** (2015)  
796 The radish genome and comprehensive gene expression profile of tuberous root  
797 formation and development. Sci Rep **5**: 10835
- 798 **Nawrocki, E.P., Burge, S.W., Bateman, A., Daub, J., Eberhardt, R.Y., Eddy, S.R.,**  
799 **Floden, E.W., Gardner, P.P., Jones, T.A., Tate, J.** (2014) Rfam 12.0: updates to the  
800 RNA families database. Nucleic Acids Res **43**: D130-D137
- 801 **Oost, E.** (1984) *xBrassicoraphanus* Sageret or *xRaphanobrassica* Karpechenko? Cruciferae  
802 Newsletter



- 803 **Park, H.R., Park, J.E., Kim, J.H., Shin, H., Yu, S.H., Son, S., Yi, G., Lee, S.-S., Kim,**  
804 **H.H., Huh, J.H.** (2020) Meiotic chromosome stability and suppression of crossover  
805 between non-homologous chromosomes in *xBrassicoraphanus*, an intergeneric  
806 allotetraploid derived from a cross between *Brassica rapa* and *Raphanus sativus*.  
807 *Front Plant Sci* **11**: 851
- 808 **Parkin, I.A., Gulden, S.M., Sharpe, A.G., Lukens, L., Trick, M., Osborn, T.C., Lydiate,**  
809 **D.J.** (2005) Segmental structure of the *Brassica napus* genome based on comparative  
810 analysis with *Arabidopsis thaliana*. *Genetics* **171**: 765-781
- 811 **Rapp, R.A., Udall, J.A., Wendel, J.F.** (2009) Genomic expression dominance in  
812 allopolyploids. *BMC Biol* **7**: 18
- 813 **Robinson, M.D., McCarthy, D.J., Smyth, G.K.** (2010) edgeR: a Bioconductor package for  
814 differential expression analysis of digital gene expression data. *Bioinformatics* **26**:  
815 139-140
- 816 **Ryan, D.P., Ehninger, D.** (2014) Bison: bisulfite alignment on nodes of a cluster. *BMC*  
817 *Bioinformatics* **15**: 337
- 818 **Shan, S., Boatwright, J.L., Liu, X., Chanderbali, A.S., Fu, C., Soltis, P.S., Soltis, D.E.**  
819 (2020) Transcriptome dynamics of the inflorescence in reciprocally formed  
820 allopolyploid *Tragopogon miscellus* (Asteraceae). *Front Genet* **11**: 888
- 821 **Slater, G.S., Birney, E.** (2005) Automated generation of heuristics for biological sequence  
822 comparison. *BMC Bioinformatics* **6**: 31
- 823 **Smit, A., Hubley, R., Green, P.** (2015) RepeatMasker Open-4.0
- 824 **Smit, A.F., Hubley, R.** (2008) RepeatModeler Open-1.0
- 825 **Soltis, P.S., Soltis, D.E.** (2009) The role of hybridization in plant speciation. *Annu Rev Plant*  
826 *Biol* **60**: 561-588
- 827 **Soltis, P.S., Soltis, D.E.** (2016) Ancient WGD events as drivers of key innovations in  
828 angiosperms. *Curr Opin Plant Biol* **30**: 159-165
- 829 **Sosnowska, K., Majka, M., Majka, J., Bocianowski, J., Kasprowicz, M., Ksiaczek, T.,**  
830 **Szala, L., Cegielska-Taras, T.** (2020) Chromosome instabilities in resynthesized  
831 *Brassica napus* revealed by FISH. *J Appl Genet* **61**: 323-335
- 832 **Stanke, M., Diekhans, M., Baertsch, R., Haussler, D.** (2008) Using native and syntenically  
833 mapped cDNA alignments to improve *de novo* gene finding. *Bioinformatics* **24**: 637-  
834 644



- 835 **Suzuki, M., Ketterling, M.G., McCarty, D.R.** (2005) Quantitative statistical analysis of *cis*-  
836 regulatory sequences in ABA/VP1- and CBF/DREB1-regulated genes of *Arabidopsis*.  
837 *Plant Physiol* **139**: 437-447
- 838 **Szadkowski, E., Eber, F., Huteau, V., Lode, M., Coriton, O., Jenczewski, E., Chevre,**  
839 **A.M.** (2011) Polyploid formation pathways have an impact on genetic rearrangements  
840 in resynthesized *Brassica napus*. *New Phytol* **191**: 884-894
- 841 **Szadkowski, E., Eber, F., Huteau, V., Lode, M., Huneau, C., Belcram, H., Coriton, O.,**  
842 **Manzanares-Dauleux, M.J., Delourme, R., King, G.J., Chalhoub, B., Jenczewski,**  
843 **E., Chevre, A.M.** (2010) The first meiosis of resynthesized *Brassica napus*, a genome  
844 blender. *New Phytol* **186**: 102-112
- 845 **Tillich, M., Lehwark, P., Pellizzer, T., Ulbricht-Jones, E.S., Fischer, A., Bock, R.,**  
846 **Greiner, S.** (2017) GeSeq - versatile and accurate annotation of organelle genomes.  
847 *Nucleic Acids Res* **45**: W6-W11
- 848 **Trapnell, C., Pachter, L., Salzberg, S.L.** (2009) TopHat: discovering splice junctions with  
849 RNA-Seq. *Bioinformatics* **25**: 1105-1111
- 850 **U, N.** (1935) Genome analysis in *Brassica* with special reference to the experimental  
851 formation of *B. napus* and peculiar mode of fertilization. *Jpn J Bot* **7**: 389-452
- 852 **Van de Peer, Y., Mizrachi, E., Marchal, K.** (2017) The evolutionary significance of  
853 polyploidy. *Nat Rev Genet* **18**: 411
- 854 **Waminal, N.E., Kim, H.H.** (2012) Dual-color FISH karyotype and rDNA distribution  
855 analyses on four Cucurbitaceae species. *Hortic Environ Biote* **53**: 49-56
- 856 **Wang, X., Wang, H., Wang, J., Sun, R., Wu, J., Liu, S., Bai, Y., Mun, J.H., Bancroft, I.,**  
857 **Cheng, F., Huang, S., Li, X., Hua, W., Wang, J., Wang, X., Freeling, M., Pires,**  
858 **J.C., Paterson, A.H., Chalhoub, B., Wang, B., Hayward, A., Sharpe, A.G., Park,**  
859 **B.S., Weisshaar, B., Liu, B., Li, B., Liu, B., Tong, C., Song, C., Duran, C., Peng,**  
860 **C., Geng, C., Koh, C., Lin, C., Edwards, D., Mu, D., Shen, D., Soumpourou, E.,**  
861 **Li, F., Fraser, F., Conant, G., Lassalle, G., King, G.J., Bonnema, G., Tang, H.,**  
862 **Wang, H., Belcram, H., Zhou, H., Hirakawa, H., Abe, H., Guo, H., Wang, H.,**  
863 **Jin, H., Parkin, I.A., Batley, J., Kim, J.S., Just, J., Li, J., Xu, J., Deng, J., Kim,**  
864 **J.A., Li, J., Yu, J., Meng, J., Wang, J., Min, J., Poulain, J., Wang, J.,**  
865 **Hatakeyama, K., Wu, K., Wang, L., Fang, L., Trick, M., Links, M.G., Zhao, M.,**  
866 **Jin, M., Ramchiary, N., Drou, N., Berkman, P.J., Cai, Q., Huang, Q., Li, R.,**  
867 **Tabata, S., Cheng, S., Zhang, S., Zhang, S., Huang, S., Sato, S., Sun, S., Kwon,**

- 868 **S.J., Choi, S.R., Lee, T.H., Fan, W., Zhao, X., Tan, X., Xu, X., Wang, Y., Qiu, Y.,**  
869 **Yin, Y., Li, Y., Du, Y., Liao, Y., Lim, Y., Narusaka, Y., Wang, Y., Wang, Z., Li,**  
870 **Z., Wang, Z., Xiong, Z., Zhang, Z., Brassica rapa Genome Sequencing Project,**  
871 **C. (2011) The genome of the mesopolyploid crop species *Brassica rapa*. Nat Genet**  
872 **43: 1035-1039**
- 873 **Wei, Y., Li, G., Zhang, S., Zhang, S., Zhang, H., Sun, R., Zhang, R., Li, F. (2021)**  
874 **Analysis of transcriptional changes in different *Brassica napus* synthetic**  
875 **allopolyploids. Genes 12**
- 876 **Wendel, J.F. (2000) Genome evolution in polyploids. Plant Mol Biol 42: 225-249**
- 877 **Wendel, J.F. (2015) The wondrous cycles of polyploidy in plants. Am J Bot 102: 1753-1756**
- 878 **Wendel, J.F., Jackson, S.A., Meyers, B.C., Wing, R.A. (2016) Evolution of plant genome**  
879 **architecture. Genome Biol 17: 37**
- 880 **Xiong, Z., Gaeta, R.T., Pires, J.C. (2011) Homoeologous shuffling and chromosome**  
881 **compensation maintain genome balance in resynthesized allopolyploid *Brassica***  
882 ***napus*. Proc Natl Acad Sci USA 108: 7908-7913**
- 883 **Yang, X.Z., Li, L. (2011) miRDeep-P: a computational tool for analyzing the microRNA**  
884 **transcriptome in plants. Bioinformatics 27: 2614-2615**
- 885 **Yoo, M.J., Liu, X., Pires, J.C., Soltis, P.S., Soltis, D.E. (2014) Nonadditive gene expression**  
886 **in polyploids. Annu Rev Genet 48: 485-517**
- 887 **Zang, C.Z., Schones, D.E., Zeng, C., Cui, K.R., Zhao, K.J., Peng, W.Q. (2009) A**  
888 **clustering approach for identification of enriched domains from histone modification**  
889 **ChIP-Seq data. Bioinformatics 25: 1952-1958**
- 890 **Zhang, H., Bian, Y., Gou, X., Zhu, B., Xu, C., Qi, B., Li, N., Rustgi, S., Zhou, H., Han,**  
891 **F., Jiang, J., von Wettstein, D., Liu, B. (2013) Persistent whole-chromosome**  
892 **aneuploidy is generally associated with nascent allohexaploid wheat. Proc Natl Acad**  
893 **Sci USA 110: 3447-3452**
- 894 **Zhong, S., Joung, J.G., Zheng, Y., Chen, Y.R., Liu, B., Shao, Y., Xiang, J.Z., Fei, Z.,**  
895 **Giovannoni, J.J. (2011) High-throughput illumina strand-specific RNA sequencing**  
896 **library preparation. Cold Spring Harb Protoc 2011: 940-949**  
897

898 **Table 1. Summary of the *xBrassicoraphanus* genome assembly.**

| Assembly information  |  | Contig                           |  | Scaffold                         |  |
|-----------------------|--|----------------------------------|--|----------------------------------|--|
| Total length / Number |  | 652.44 Mb / 68,454 ea            |  | 692.83 Mb / 20,299 ea            |  |
| Average / Median      |  | 9.53 kb / 2.40 kb                |  | 34.13 kb / 901 bp                |  |
| Max / Min length      |  | 190.62 kb / 200 bp               |  | 16.46 Mb / 213 bp                |  |
| N50                   |  | 28,581 bp (6,854 <sup>th</sup> ) |  | 4,479,746 bp (49 <sup>th</sup> ) |  |
| N90                   |  | 5,982 bp (24,969 <sup>th</sup> ) |  | 166,698 bp (284 <sup>th</sup> )  |  |
| GC contents           |  | 35.75%                           |  | 33.68%                           |  |

  

| Scaffold assignment                                                               | Total number            | Assigned to A <sub>xB</sub> genome | Assigned to R <sub>xB</sub> genome | Unassigned            |
|-----------------------------------------------------------------------------------|-------------------------|------------------------------------|------------------------------------|-----------------------|
| No. of scaffolds                                                                  | 20,299                  | 7,790                              | 7,364                              | 5,145                 |
| Cumulative size (bp)<br>(% of total assembly)                                     | 692,831,961<br>(100%)   | 335,554,805<br>(48.43%)            | 343,544,771<br>(49.59%)            | 13,732,385<br>(1.98%) |
| No. of scaffolds assigned to reference chromosomes                                | 213                     | 129                                | 84                                 |                       |
| Size of scaffolds assigned to reference chromosomes (bp)<br>(% of total assembly) | 581,691,615<br>(83.96%) | 279,795,674<br>(83.38%)            | 301,895,941<br>(87.87%)            |                       |

  

| Species                  | Protein-coding loci | Total CDS length (bp) | Average CDS length (bp) | Average exon length (bp) | Average intron length (bp) |
|--------------------------|---------------------|-----------------------|-------------------------|--------------------------|----------------------------|
| <i>xBrassicoraphanus</i> | 87,861              | 106,896,611           | 1,216                   | 244                      | 196                        |
| <i>B. rapa</i>           | 42,601              | 49,456,892            | 1,172                   | 233                      | 209                        |
| <i>R. sativus</i>        | 52,326              | 67,790,376            | 1,295                   | 252                      | 170                        |

899

**A**

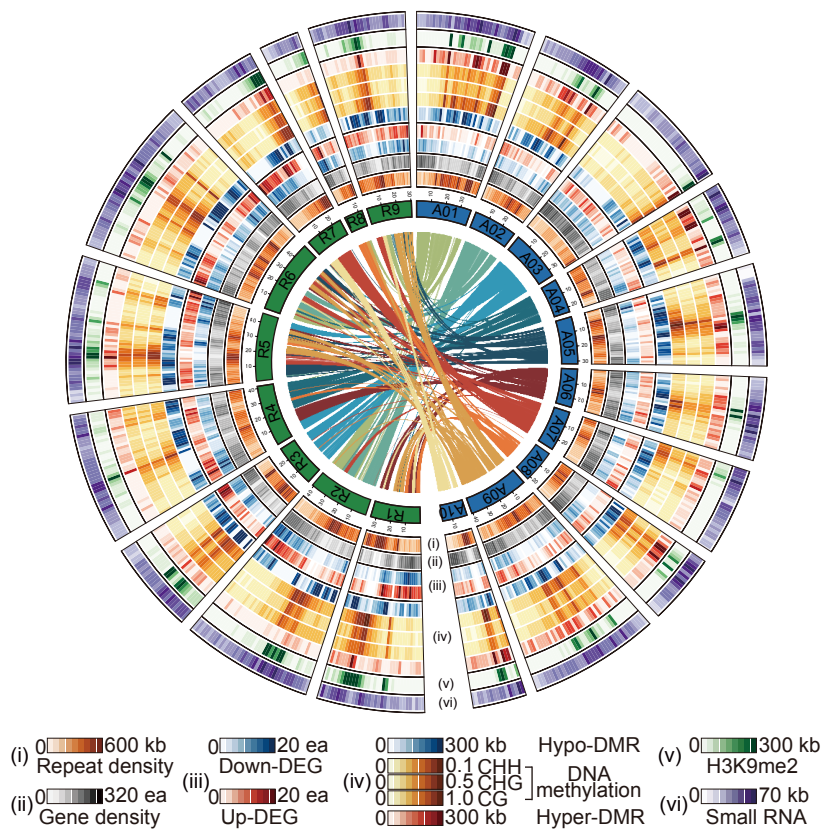

**B**

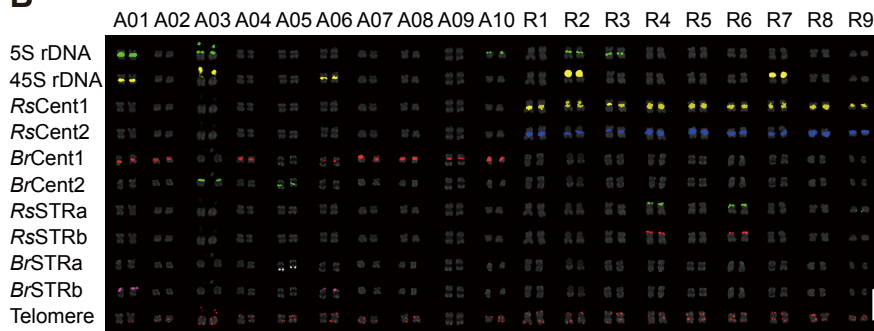

**Figure 1** Genome structure of *xBrassicoraphanus*. **A**, The *xB* genome comprises 10  $A_{xB}$  and 9  $R_{xB}$  chromosomes. The data tracks represent (i) repeat density; (ii) gene density; (iii) DEGs between *xB* and its progenitor seedlings; (iv) CG, CHG, and CHH methylation levels and DMRs; (v) H3K9me2 repressive histone mark; and (vi) small RNAs. Lines in the inner circle represent syntenic relationships between  $A_{xB}$  and  $R_{xB}$ . **B**, Multicolor Fluorescence *in situ* Hybridization (FISH) karyograms of *xB* with specific probes for 5S rDNA, 45S rDNA, centromeric tandem repeats (Cent), short tandem repeats (STR) and telomere repeats. Scale bars = 10  $\mu$ m.

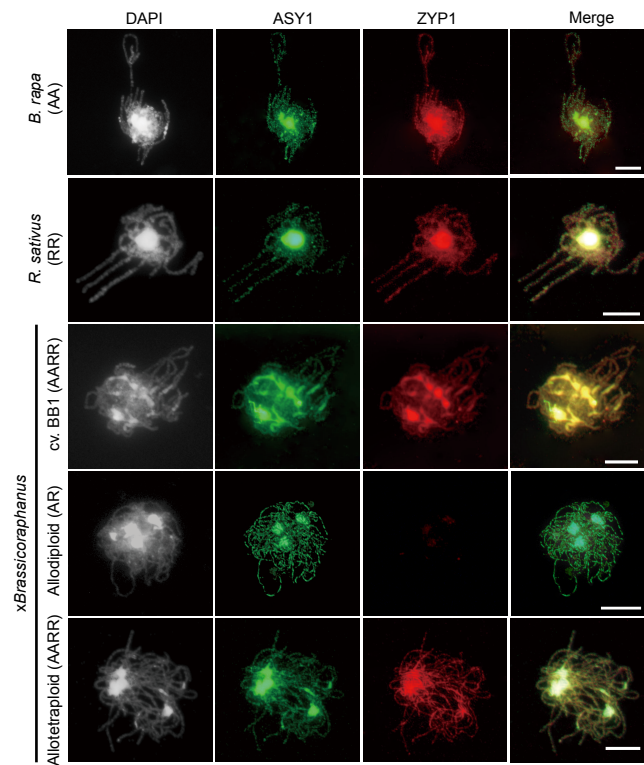

**Figure 2** Chromosome behaviors of *xBrassicoraphanus*. Coimmunolocalization of ASY1 (green) and ZYP1 (red) at pachytene in *Br* (AA), *Rs* (RR), *xB* cv. BB1 (AARR), and resynthesized allodiploids (AR) and allotetraploid (AARR) *xB*. Chromosomes were stained with DAPI (white) and the overlay of three signals is shown (merge). Scale bars = 10  $\mu$ m.

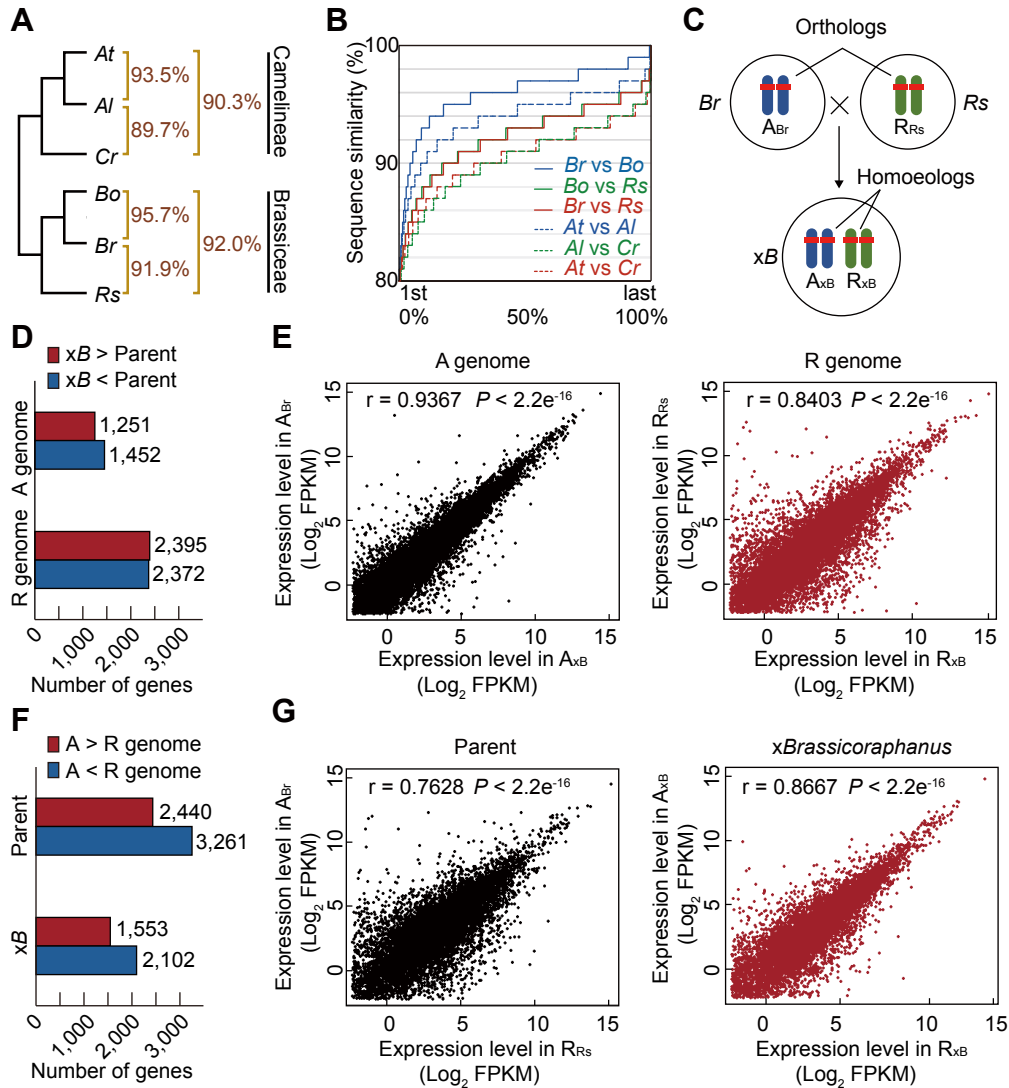

**Figure 3** Transcriptome changes in *xB*. A, Phylogenetic relationship and sequence divergence in Camelinae and Brassiceae tribes. Percentages between species represent their CDS similarity of orthologous gene pairs. *At*, *Arabidopsis thaliana*; *Al*, *A. lyrata*; *Cr*, *Capsella rubella*. B, Distribution of sequence similarities of interspecific/intergeneric orthologs. Horizontal axis indicates orthologous gene pairs sorted in ascending order of sequence similarity. C, Relationship between orthologous and homoeologous genes in progenitors and *xB*. D, Number of DEGs in *xB* relative to the progenitors ( $A_{Br}$  vs.  $A_{xB}$  and  $R_{Rs}$  vs.  $R_{xB}$ ). E, Scatter plots comparing gene expression levels between  $A_{Br}$  and  $A_{xB}$  (black), and  $R_{Rs}$  and  $R_{xB}$  (red). F, Number of DEGs of orthologous pairs between  $A_{Br}$  and  $R_{Rs}$ , and homoeologous pairs between  $A_{xB}$  and  $R_{xB}$ . G, Scatter plots comparing gene expression levels between  $A_{Br}$  and  $R_{Rs}$  (black), and  $A_{xB}$  and  $R_{xB}$  (red).

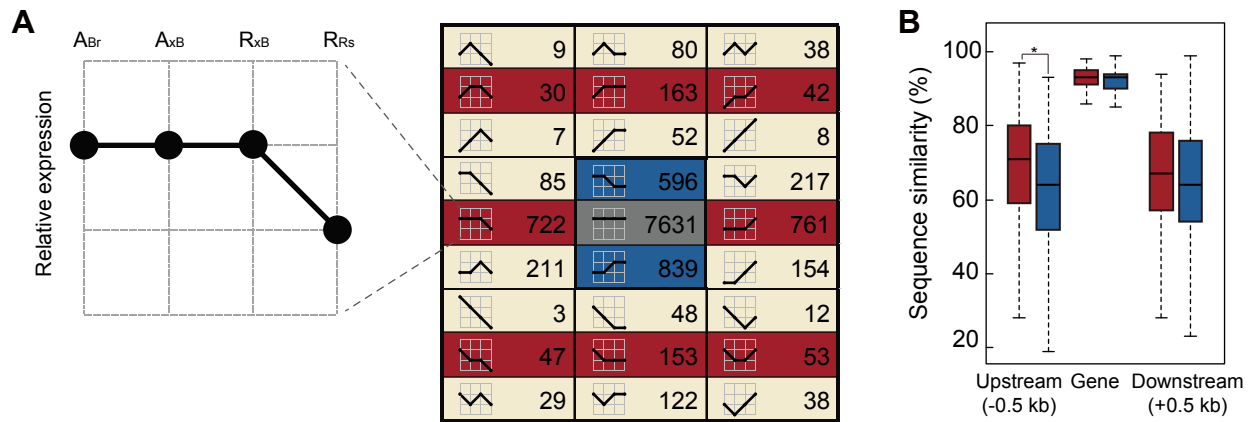

**Figure 4** Expression patterns of homoeologous pairs in *xB*. A, Classifications of expression patterns of homoeologs in the *xB* relative to progenitor orthologs. The gray, blue and red blocks represent gene pairs showing ‘constant’, ‘biased’ and ‘convergent’ expressions, respectively. B, Sequence similarities of genic and adjacent upstream/downstream regions of orthologous genes showing convergent (red) and biased (blue) expressions in *xB* subgenomes (Wilcoxon’s rank-sum test, \* $P < 2.2e^{-10}$ ).



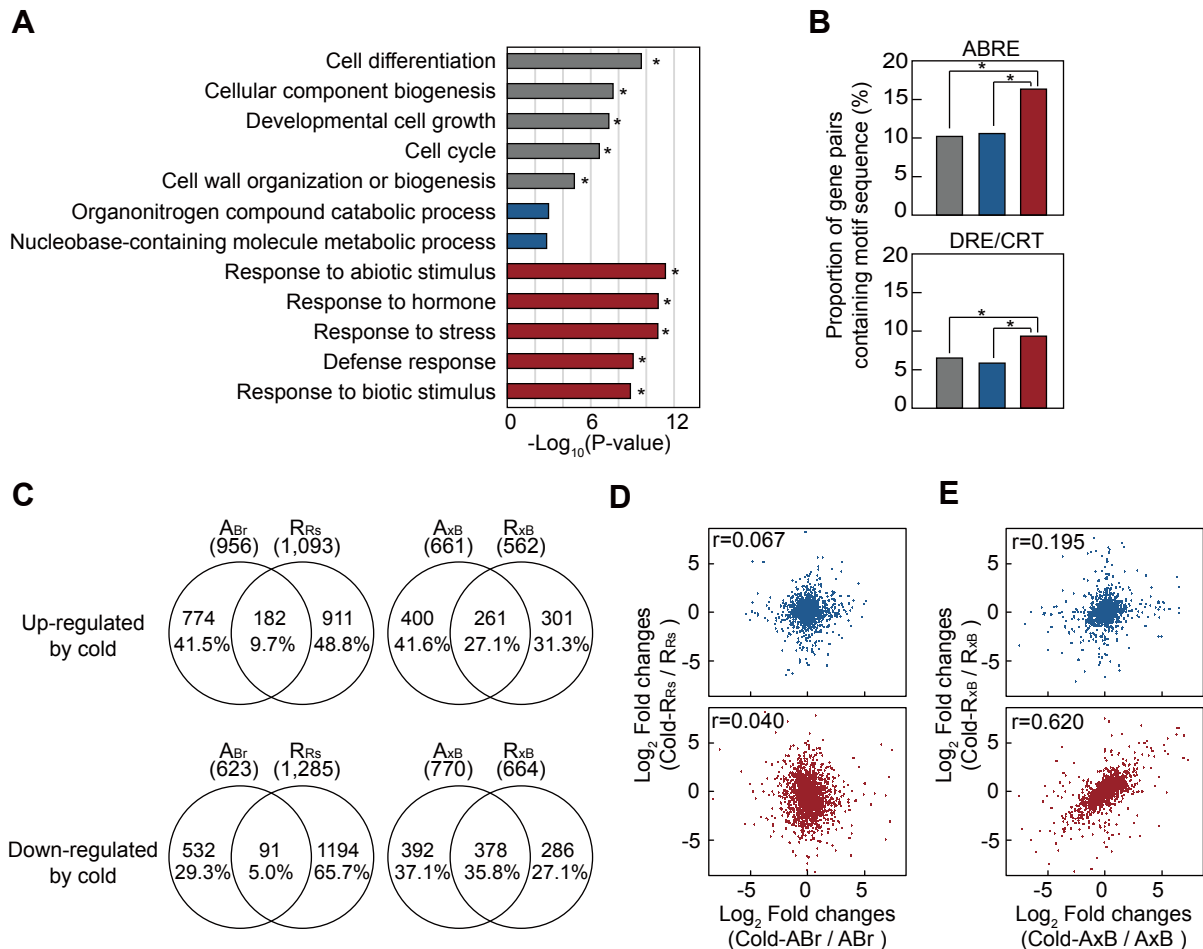

**Figure 5** Expression of homoeologous genes in response to external stimuli. A, GO enrichments of ‘constant’ (gray), ‘biased’ (blue) and ‘convergent’ (red) homoeologous pairs (Fisher’s exact test, \* $P < 0.001$ ). B, Proportion of ‘constant’ (gray), ‘biased’ (blue) and ‘convergent’ (red) homoeologous pairs containing conserved sequences of abscisic acid-responsive element (ABRE) and dehydration-responsive element/C-repeat element (DRE/CRT) (Fisher’s exact test, \* $P < 0.001$ ). C, Venn diagram of cold-induced DEGs between  $A_{Br}$  and  $R_{R_S}$  orthologs (left) and between  $A_{x_B}$  and  $R_{x_B}$  homoeologs (right). D, Scatter plots of cold-induced expression changes of  $A_{Br}$  and  $R_{R_S}$  orthologous genes showing ‘biased’ (blue) and ‘convergent’ (red) expressions. E, Scatters plots of cold-induced expression changes of  $A_{x_B}$  and  $R_{x_B}$  homoeologous genes showing ‘biased’ (blue) and ‘convergent’ (red) expressions.



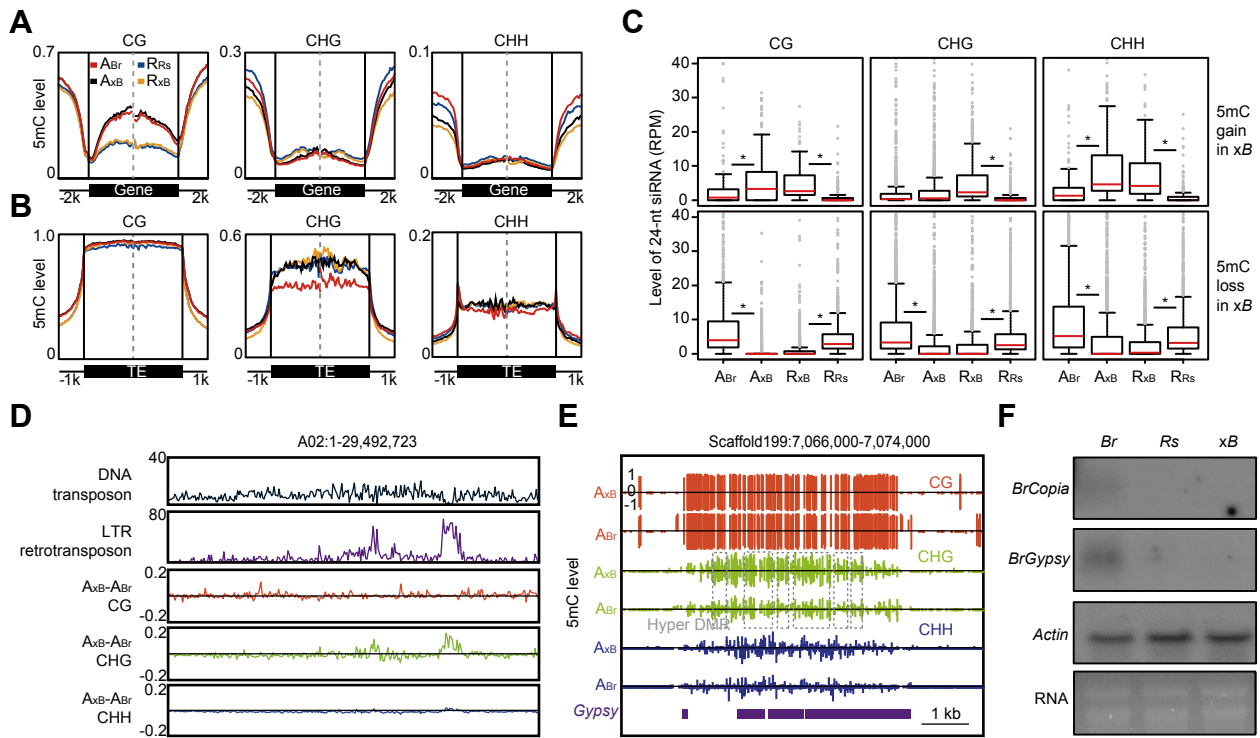

**Figure 6** Relationships of DNA methylation, small RNA and TE expression in *xBrassicoraphanus*. A and B, Distribution of DNA methylation at gene body (A) and TE regions (B) in *xB* subgenomes (A<sub>xB</sub> and R<sub>xB</sub>) and its progenitor genomes (A<sub>Br</sub> and R<sub>Rs</sub>). C, Expression levels of 24-nt RNAs at CG, CHG and CHH DMRs in *xB* subgenomes (A<sub>xB</sub> and R<sub>xB</sub>) and the progenitor genomes (A<sub>Br</sub> and R<sub>Rs</sub>). The expression level of 24-nt RNAs was calculated as reads per million (RPM) (two-tailed Student's t-test, \*P < 5.0e<sup>-5</sup>). D, Distributions of DNA transposons, LTRs and DNA methylation difference between A<sub>Br</sub> and A<sub>xB</sub> across chromosome A02 in 100 kb bins. E, An example of methylation distributions at hypermethylated *Gypsy* class LTR in A<sub>xB</sub> and A<sub>Br</sub>. F, Northern blot for *BrCopia* and *BrGypsy*. Actin was used as a loading control.

## Parsed Citations

Abbott, R., Albach, D., Ansell, S., Arntzen, J.W., Baird, S.J.E., Bierne, N., Boughman, J.W., Brelsford, A., Buerkle, C.A., Buggs, R., Butlin, R.K., Dieckmann, U., Eroukmanoff, F., Grill, A., Cahan, S.H., Hermansen, J.S., Hewitt, G., Hudson, A.G., Jiggins, C., Jones, J., Keller, B., Marczewski, T., Mallet, J., Martinez-Rodriguez, P., Most, M., Mullen, S., Nichols, R., Nolte, A.W., Parisod, C., Pfennig, K., Rice, A.M., Ritchie, M.G., Seifert, B., Smadja, C.M., Stelkens, R., Szymura, J.M., Vainola, R., Wolf, J.B.W., Zinner, D. (2013) Hybridization and speciation. *J Evol Biol* 26: 229-246

Google Scholar: [Author Only](#) [Title Only](#) [Author and Title](#)

Alexa, A., Rahnenfuhrer, J. (2010) topGO: enrichment analysis for gene ontology. R package version 2

Google Scholar: [Author Only](#) [Title Only](#) [Author and Title](#)

Anders, S., Pyl, P.T., Huber, W. (2015) HTSeq-a Python framework to work with high-throughput sequencing data. *Bioinformatics* 31: 166-169

Google Scholar: [Author Only](#) [Title Only](#) [Author and Title](#)

Armstrong, S.J., Caryl, A.P., Jones, G.H., Franklin, F.C. (2002) *Asy1*, a protein required for meiotic chromosome synapsis, localizes to axis-associated chromatin in *Arabidopsis* and *Brassica*. *J Cell Sci* 115: 3645-3655

Google Scholar: [Author Only](#) [Title Only](#) [Author and Title](#)

Axtell, M.J. (2013) ShortStack: comprehensive annotation and quantification of small RNA genes. *RNA* 19: 740-751

Google Scholar: [Author Only](#) [Title Only](#) [Author and Title](#)

Boetzer, M., Henkel, C.V., Jansen, H.J., Butler, D., Pirovano, W. (2011) Scaffolding pre-assembled contigs using SSPACE. *Bioinformatics* 27: 578-579

Google Scholar: [Author Only](#) [Title Only](#) [Author and Title](#)

Buggs, R.J.A., Zhang, L.J., Miles, N., Tate, J.A., Gao, L., Wei, W., Schnable, P.S., Barbazuk, W.B., Soltis, P.S., Soltis, D.E. (2011) Transcriptomic shock generates evolutionary novelty in a newly formed, natural allopolyploid plant. *Curr Biol* 21: 551-556

Google Scholar: [Author Only](#) [Title Only](#) [Author and Title](#)

Chelysheva, L.A., Grandont, L., Grelon, M. (2013) Immunolocalization of meiotic proteins in Brassicaceae: method 1. *Methods Mol Biol* 990: 93-101

Google Scholar: [Author Only](#) [Title Only](#) [Author and Title](#)

Chen, S., Ren, F., Zhang, L., Liu, Y., Chen, X., Li, Y., Zhang, L., Zhu, B., Zeng, P., Li, Z., Larkin, R.M., Kuang, H. (2018) Unstable allotetraploid tobacco genome due to frequent homeologous recombination, segmental deletion, and chromosome loss. *Mol Plant* 11: 914-927

Google Scholar: [Author Only](#) [Title Only](#) [Author and Title](#)

Cheng, F., Wu, J., Cai, X., Liang, J.L., Freeling, M., Wang, X.W. (2018) Gene retention, fractionation and subgenome differences in polyploid plants. *Nat Plants* 4: 258-268

Google Scholar: [Author Only](#) [Title Only](#) [Author and Title](#)

Darwin, C. (1903) *More letters of Charles Darwin: a record of his work in a series of hitherto unpublished letters* (D. Appleton)

Google Scholar: [Author Only](#) [Title Only](#) [Author and Title](#)

Dion-Cote, A.M., Barbash, D.A. (2017) Beyond speciation genes: an overview of genome stability in evolution and speciation. *Curr Opin Genet Dev* 47: 17-23

Google Scholar: [Author Only](#) [Title Only](#) [Author and Title](#)

**Dolstra, O. (1982) *Synthesis and fertility of Brassicoraphanus and ways of transferring Raphanus characters to Brassica* (Pudoc)**

Frankham, R., Ballou, J.D., Eldridge, M.D., Lacy, R.C., Ralls, K., Dudash, M.R., Fenster, C.B. (2011) Predicting the probability of outbreeding depression. *Conserv Biol* 25: 465-475

Google Scholar: [Author Only](#) [Title Only](#) [Author and Title](#)

Freese, N.H., Norris, D.C., Loraine, A.E. (2016) Integrated genome browser: visual analytics platform for genomics. *Bioinformatics* 32: 2089-2095

Google Scholar: [Author Only](#) [Title Only](#) [Author and Title](#)

Gaeta, R.T., Pires, J.C., Iniguez-Luy, F., Leon, E., Osborn, T.C. (2007) Genomic changes in resynthesized *Brassica napus* and their effect on gene expression and phenotype. *Plant Cell* 19: 3403-3417

Google Scholar: [Author Only](#) [Title Only](#) [Author and Title](#)

Grandont, L., Cunado, N., Coriton, O., Huteau, V., Eber, F., Chevre, A.M., Grelon, M., Chelysheva, L., Jenczewski, E. (2014) Homeologous chromosome sorting and progression of meiotic recombination in *Brassica napus*: ploidy does matter! *Plant Cell* 26: 1448-1463

Google Scholar: [Author Only](#) [Title Only](#) [Author and Title](#)

Grant, C.E., Bailey, T.L., Noble, W.S. (2011) FIMO: scanning for occurrences of a given motif. *Bioinformatics* 27: 1017-1018

Google Scholar: [Author Only](#) [Title Only](#) [Author and Title](#)

Greaves, I.K., Gonzalez-Bayon, R., Wang, L., Zhu, A., Liu, P.C., Groszmann, M., Peacock, W.J., Dennis, E.S. (2015) Epigenetic changes in hybrids. *Plant Physiol* 168: 1197-1205

Google Scholar: [Author Only Title Only Author and Title](#)

Grover, C.E., Gallagher, J.P., Szadkowski, E.P., Yoo, M.J., Fligel, L.E., Wendel, J.F. (2012) Homoeolog expression bias and expression level dominance in allopolyploids. *New Phytol* 196: 966-971

Google Scholar: [Author Only Title Only Author and Title](#)

Haas, B.J., Salzberg, S.L., Zhu, W., Pertea, M., Allen, J.E., Orvis, J., White, O., Buell, C.R., Wortman, J.R. (2008) Automated eukaryotic gene structure annotation using EVIDENCEModeler and the program to assemble spliced alignments. *Genome Biol* 9: R7

Google Scholar: [Author Only Title Only Author and Title](#)

Hegarty, M.J., Barker, G.L., Wilson, I.D., Abbott, R.J., Edwards, K.J., Hiscock, S.J. (2006) Transcriptome shock after interspecific hybridization in *Senecio* is ameliorated by genome duplication. *Curr Biol* 16: 1652-1659

Google Scholar: [Author Only Title Only Author and Title](#)

Heinz, S., Benner, C., Spann, N., Bertolino, E., Lin, Y.C., Laslo, P., Cheng, J.X., Murre, C., Singh, H., Glass, C.K. (2010) Simple combinations of lineage-determining transcription factors prime cis-regulatory elements required for macrophage and B cell identities. *Mol Cell* 38: 576-589

Google Scholar: [Author Only Title Only Author and Title](#)

Higgins, J.D., Sanchez-Moran, E., Armstrong, S.J., Jones, G.H., Franklin, F.C. (2005) The *Arabidopsis* synaptonemal complex protein ZYP1 is required for chromosome synapsis and normal fidelity of crossing over. *Genes Dev* 19: 2488-2500

Google Scholar: [Author Only Title Only Author and Title](#)

Hu, G., Wendel, J.F. (2019) Cis-trans controls and regulatory novelty accompanying allopolyploidization. *New Phytol* 221: 1691-1700

Google Scholar: [Author Only Title Only Author and Title](#)

Huang, H., Tong, Y., Zhang, Q.J., Gao, L.Z. (2013) Genome size variation among and within *Camellia* species by using flow cytometric analysis. *Plos One* 8: e64981

Google Scholar: [Author Only Title Only Author and Title](#)

Inomata, N. (1977) Production of interspecific hybrids between *Brassica campestris* and *Brassica oleracea* by culture in vitro of excised ovaries: I. Effects of yeast extract and casein hydrolysate on the development of excised ovaries. *Jpn J Breed* 27: 295-304

Google Scholar: [Author Only Title Only Author and Title](#)

Jeong, Y.M., Kim, N., Ahn, B.O., Oh, M., Chung, W.H., Chung, H., Jeong, S., Lim, K.B., Hwang, Y.J., Kim, G.B., Baek, S., Choi, S.B., Hyung, D.J., Lee, S.W., Sohn, S.H., Kwon, S.J., Jin, M., Seol, Y.J., Chae, W.B., Choi, K.J., Park, B.S., Yu, H.J., Mun, J.H. (2016) Elucidating the triplicated ancestral genome structure of radish based on chromosome-level comparison with the *Brassica* genomes. *Theor Appl Genet* 129: 1357-1372

Google Scholar: [Author Only Title Only Author and Title](#)

Kajitani, R., Toshimoto, K., Noguchi, H., Toyoda, A., Ogura, Y., Okuno, M., Yabana, M., Harada, M., Nagayasu, E., Maruyama, H., Kohara, Y., Fujiyama, A., Hayashi, T., Itoh, T. (2014) Efficient de novo assembly of highly heterozygous genomes from whole-genome shotgun short reads. *Genome Res* 24: 1384-1395

Google Scholar: [Author Only Title Only Author and Title](#)

Karpechenko, G.D. (1928) Polyploid hybrids of *Raphanus sativus* L. x *Brassica oleracea* L. *Mol Gen Genet* 48: 1-85

Google Scholar: [Author Only Title Only Author and Title](#)

Kim, C.K., Seol, Y.J., Perumal, S., Lee, J., Waminal, N.E., Jayakodi, M., Lee, S.C., Jin, S., Choi, B.S., Yu, Y., Ko, H.C., Choi, J.W., Ryu, K.Y., Sohn, S.H., Parkin, I., Yang, T.J. (2018) Re-exploration of U's triangle *Brassica* species based on chloroplast genomes and 45S nrDNA sequences. *Sci Rep* 8: 1-11

Google Scholar: [Author Only Title Only Author and Title](#)

Kim, J.S., Lim, J.Y., Shin, H., Kim, B.G., Yoo, S.D., Kim, W.T., Huh, J.H. (2019) ROS1-dependent DNA demethylation is required for ABA-inducible NIC3 expression. *Plant Physiol* 179: 1810-1821

Google Scholar: [Author Only Title Only Author and Title](#)

Kim, S., Park, M., Yeom, S.I., Kim, Y.M., Lee, J.M., Lee, H.A., Seo, E., Choi, J., Cheong, K., Kim, K.T., Jung, K., Lee, G.W., Oh, S.K., Bae, C., Kim, S.B., Lee, H.Y., Kim, S.Y., Kim, M.S., Kang, B.C., Jo, Y.D., Yang, H.B., Jeong, H.J., Kang, W.H., Kwon, J.K., Shin, C., Lim, J.Y., Park, J.H., Huh, J.H., Kim, J.S., Kim, B.D., Cohen, O., Paran, I., Suh, M.C., Lee, S.B., Kim, Y.K., Shin, Y., Noh, S.J., Park, J., Seo, Y.S., Kwon, S.Y., Kim, H.A., Park, J.M., Kim, H.J., Choi, S.B., Bosland, P.W., Reeves, G., Jo, S.H., Lee, B.W., Cho, H.T., Choi, H.S., Lee, M.S., Yu, Y., Do Choi, Y., Park, B.S., van Deynze, A., Ashrafi, H., Hill, T., Kim, W.T., Pai, H.S., Ahn, H.K., Yeom, I., Giovannoni, J.J., Rose, J.K.C., Sorensen, I., Lee, S.J., Kim, R.W., Choi, I.Y., Choi, B.S., Lim, J.S., Lee, Y.H., Choi, D. (2014) Genome sequence of the hot pepper provides insights into the evolution of pungency in *Capsicum* species. *Nat Genet* 46: 270

Google Scholar: [Author Only Title Only Author and Title](#)

Kozomara, A., Griffiths-Jones, S. (2013) miRBase: annotating high confidence microRNAs using deep sequencing data. *Nucleic Acids Res* 42: D68-D73

Google Scholar: [Author Only Title Only Author and Title](#)

Krzywinski, M., Schein, J., Birol, I., Connors, J., Gascoyne, R., Horsman, D., Jones, S.J., Marra, M.A. (2009) Circos: an information

aesthetic for comparative genomics. *Genome Res* 19: 1639-1645

Google Scholar: [Author Only](#) [Title Only](#) [Author and Title](#)

Langmead, B., Trapnell, C., Pop, M., Salzberg, S.L. (2009) Ultrafast and memory-efficient alignment of short DNA sequences to the human genome. *Genome Biol* 10: R25.

Google Scholar: [Author Only](#) [Title Only](#) [Author and Title](#)

Law, J.A, Jacobsen, S.E. (2010) Establishing, maintaining and modifying DNA methylation patterns in plants and animals. *Nat Rev Genet* 11: 204-220

Google Scholar: [Author Only](#) [Title Only](#) [Author and Title](#)

Lafon-Placette, C., Kohler, C. (2015) Epigenetic mechanisms of postzygotic reproductive isolation in plants. *Curr Opin Plant Biol* 23: 39-44

Google Scholar: [Author Only](#) [Title Only](#) [Author and Title](#)

Lee, J., He, K., Stolc, V., Lee, H., Figueroa, P., Gao, Y., Tongprasit, W., Zhao, H., Lee, I., Deng, X.W. (2007) Analysis of transcription factor HY5 genomic binding sites revealed its hierarchical role in light regulation of development. *Plant Cell* 19: 731-749

Google Scholar: [Author Only](#) [Title Only](#) [Author and Title](#)

Lee, S.-S., Lee, S.-A., Yang, J., Kim, J. (2011) Developing stable progenies of  $\times$ Brassicoraphanus, an intergeneric allopolyploid between *Brassica rapa* and *Raphanus sativus*, through induced mutation using microspore culture. *Theor Appl Genet* 122: 885-891

Google Scholar: [Author Only](#) [Title Only](#) [Author and Title](#)

Li, M., Wang, R., Wu, X., Wang, J. (2020) Homoeolog expression bias and expression level dominance (ELD) in four tissues of natural allotetraploid *Brassica napus*. *BMC Genomics* 21: 330

Google Scholar: [Author Only](#) [Title Only](#) [Author and Title](#)

Lieberman-Lazarovich, M., Yahav, C., Israeli, A., Efroni, I. (2019) Deep conservation of cis-element variants regulating plant hormonal responses. *Plant Cell* 31: 2559-2572

Google Scholar: [Author Only](#) [Title Only](#) [Author and Title](#)

Lohse, M., Drechsel, O., Kahlau, S., Bock, R. (2013) OrganellarGenomeDRAW-a suite of tools for generating physical maps of plastid and mitochondrial genomes and visualizing expression data sets. *Nucleic Acids Res* 41: W575-W581

Google Scholar: [Author Only](#) [Title Only](#) [Author and Title](#)

Luo, R., Liu, B., Xie, Y., Li, Z., Huang, W., Yuan, J., He, G., Chen, Y., Pan, Q., Liu, Y. (2015) SOAPdenovo2: an empirically improved memory-efficient short-read de novo assembler. *GigaScience* 4: s13742-13015-10069-13742

Google Scholar: [Author Only](#) [Title Only](#) [Author and Title](#)

Marcais, G., Kingsford, C. (2011) A fast, lock-free approach for efficient parallel counting of occurrences of k-mers. *Bioinformatics* 27: 764-770

Google Scholar: [Author Only](#) [Title Only](#) [Author and Title](#)

Martiensen, R.A (2010) Heterochromatin, small RNA and post-fertilization dysgenesis in allopolyploid and interplod hybrids of *Arabidopsis*. *New Phytol* 186: 46-53

Google Scholar: [Author Only](#) [Title Only](#) [Author and Title](#)

Martin, M. (2011) Cutadapt removes adapter sequences from high-throughput sequencing reads. *EMBnet.journal* 17: 10-12

Google Scholar: [Author Only](#) [Title Only](#) [Author and Title](#)

Martinez-Perez, E., Colaiacovo, M.P. (2009) Distribution of meiotic recombination events: talking to your neighbors. *Curr Opin Genet Dev* 19: 105-112

Google Scholar: [Author Only](#) [Title Only](#) [Author and Title](#)

McClintock, B. (1984) The significance of responses of the genome to challenge. *Science* 226: 792-801

Google Scholar: [Author Only](#) [Title Only](#) [Author and Title](#)

Mcnaughton, I.H. (1973) Synthesis and Sterility of *Raphanobrassica*. *Euphytica* 22: 70-88

Google Scholar: [Author Only](#) [Title Only](#) [Author and Title](#)

Mitsui, Y., Shimomura, M., Komatsu, K., Namiki, N., Shibata-Hatta, M., Imai, M., Katayose, Y., Mukai, Y., Kanamori, H., Kurita, K., Kagami, T., Wakatsuki, A., Ohyanagi, H., Ikawa, H., Minaka, N., Nakagawa, K., Shiwa, Y., Sasaki, T. (2015) The radish genome and comprehensive gene expression profile of tuberous root formation and development. *Sci Rep* 5: 10835

Google Scholar: [Author Only](#) [Title Only](#) [Author and Title](#)

Nawrocki, E.P., Burge, S.W., Bateman, A., Daub, J., Eberhardt, R.Y., Eddy, S.R., Floden, E.W., Gardner, P.P., Jones, T.A., Tate, J. (2014) Rfam 12.0: updates to the RNA families database. *Nucleic Acids Res* 43: D130-D137

Google Scholar: [Author Only](#) [Title Only](#) [Author and Title](#)

**Oost, E. (1984)  $\times$ Brassicoraphanus Sageret or  $\times$ Raphanobrassica Karpechenko? *Cruciferae Newsletter***

Park, H.R., Park, J.E., Kim, J.H., Shin, H., Yu, S.H., Son, S., Yi, G., Lee, S.-S., Kim, H.H., Huh, J.H. (2020) Meiotic chromosome stability and suppression of crossover between non-homologous chromosomes in  $\times$ Brassicoraphanus, an intergeneric allotetraploid derived from a cross between *Brassica rapa* and *Raphanus sativus*. *Front Plant Sci* 11: 851

- Google Scholar: [Author Only](#) [Title Only](#) [Author and Title](#)
- Parkin, I.A., Gulden, S.M., Sharpe, A.G., Lukens, L., Trick, M., Osborn, T.C., Lydiate, D.J. (2005) Segmental structure of the *Brassica napus* genome based on comparative analysis with *Arabidopsis thaliana*. *Genetics* 171: 765-781  
Google Scholar: [Author Only](#) [Title Only](#) [Author and Title](#)
- Rapp, R.A., Udall, J.A., Wendel, J.F. (2009) Genomic expression dominance in allopolyploids. *BMC Biol* 7: 18  
Google Scholar: [Author Only](#) [Title Only](#) [Author and Title](#)
- Robinson, M.D., McCarthy, D.J., Smyth, G.K. (2010) edgeR: a Bioconductor package for differential expression analysis of digital gene expression data. *Bioinformatics* 26: 139-140  
Google Scholar: [Author Only](#) [Title Only](#) [Author and Title](#)
- Ryan, D.P., Ehninger, D. (2014) Bison: bisulfite alignment on nodes of a cluster. *BMC Bioinformatics* 15: 337  
Google Scholar: [Author Only](#) [Title Only](#) [Author and Title](#)
- Shan, S., Boatwright, J.L., Liu, X., Chanderbali, A.S., Fu, C., Soltis, P.S., Soltis, D.E. (2020) Transcriptome dynamics of the inflorescence in reciprocally formed allopolyploid *Tragopogon miscellus* (Asteraceae). *Front Genet* 11: 888  
Google Scholar: [Author Only](#) [Title Only](#) [Author and Title](#)
- Slater, G.S., Birney, E. (2005) Automated generation of heuristics for biological sequence comparison. *BMC Bioinformatics* 6: 31  
Google Scholar: [Author Only](#) [Title Only](#) [Author and Title](#)
- Smit, A, Hubley, R., Green, P. (2015) RepeatMasker Open-4.0**
- Smit, A.F., Hubley, R. (2008) RepeatModeler Open-1.0**
- Soltis, P.S., Soltis, D.E. (2009) The role of hybridization in plant speciation. *Annu Rev Plant Biol* 60: 561-588  
Google Scholar: [Author Only](#) [Title Only](#) [Author and Title](#)
- Soltis, P.S., Soltis, D.E. (2016) Ancient WGD events as drivers of key innovations in angiosperms. *Curr Opin Plant Biol* 30: 159-165  
Google Scholar: [Author Only](#) [Title Only](#) [Author and Title](#)
- Sosnowska, K., Majka, M., Majka, J., Bocianowski, J., Kasproicz, M., Ksiaczczyk, T., Szala, L., Cegielska-Taras, T. (2020) Chromosome instabilities in resynthesized *Brassica napus* revealed by FISH. *J Appl Genet* 61: 323-335  
Google Scholar: [Author Only](#) [Title Only](#) [Author and Title](#)
- Stanke, M., Diekhans, M., Baertsch, R., Haussler, D. (2008) Using native and syntenically mapped cDNA alignments to improve de novo gene finding. *Bioinformatics* 24: 637-644  
Google Scholar: [Author Only](#) [Title Only](#) [Author and Title](#)
- Suzuki, M., Ketterling, M.G., McCarty, D.R. (2005) Quantitative statistical analysis of cis-regulatory sequences in ABAVP1- and CBF/DREB1-regulated genes of *Arabidopsis*. *Plant Physiol* 139: 437-447  
Google Scholar: [Author Only](#) [Title Only](#) [Author and Title](#)
- Szadkowski, E., Eber, F., Huteau, V., Lode, M., Coriton, O., Jenczewski, E., Chevre, A.M. (2011) Polyploid formation pathways have an impact on genetic rearrangements in resynthesized *Brassica napus*. *New Phytol* 191: 884-894  
Google Scholar: [Author Only](#) [Title Only](#) [Author and Title](#)
- Szadkowski, E., Eber, F., Huteau, V., Lode, M., Huneau, C., Belcram, H., Coriton, O., Manzanares-Dauleux, M.J., Delourme, R., King, G.J., Chalhoub, B., Jenczewski, E., Chevre, A.M. (2010) The first meiosis of resynthesized *Brassica napus*, a genome blender. *New Phytol* 186: 102-112  
Google Scholar: [Author Only](#) [Title Only](#) [Author and Title](#)
- Tillich, M., Lehwark, P., Pellizzer, T., Ulbricht-Jones, E.S., Fischer, A., Bock, R., Greiner, S. (2017) GeSeq - versatile and accurate annotation of organelle genomes. *Nucleic Acids Res* 45: W6-W11  
Google Scholar: [Author Only](#) [Title Only](#) [Author and Title](#)
- Trapnell, C., Pachter, L., Salzberg, S.L. (2009) TopHat: discovering splice junctions with RNA-Seq. *Bioinformatics* 25: 1105-1111  
Google Scholar: [Author Only](#) [Title Only](#) [Author and Title](#)
- U, N. (1935) Genome analysis in *Brassica* with special reference to the experimental formation of *B. napus* and peculiar mode of fertilization. *Jpn J Bot* 7: 389-452  
Google Scholar: [Author Only](#) [Title Only](#) [Author and Title](#)
- Van de Peer, Y., Mizrachi, E., Marchal, K. (2017) The evolutionary significance of polyploidy. *Nat Rev Genet* 18: 411  
Google Scholar: [Author Only](#) [Title Only](#) [Author and Title](#)
- Waminal, N.E., Kim, H.H. (2012) Dual-color FISH karyotype and rDNA distribution analyses on four Cucurbitaceae species. *Hortic Environ Biote* 53: 49-56  
Google Scholar: [Author Only](#) [Title Only](#) [Author and Title](#)
- Wang, X., Wang, H., Wang, J., Sun, R., Wu, J., Liu, S., Bai, Y., Mun, J.H., Bancroft, I., Cheng, F., Huang, S., Li, X., Hua, W., Wang, J., Wang, X., Freeling, M., Pires, J.C., Paterson, A.H., Chalhoub, B., Wang, B., Hayward, A., Sharpe, A.G., Park, B.S., Weisshaar, B., Liu, B., Li, B.,



Liu, B., Tong, C., Song, C., Duran, C., Peng, C., Geng, C., Koh, C., Lin, C., Edwards, D., Mu, D., Shen, D., Soumpourou, E., Li, F., Fraser, F., Conant, G., Lassalle, G., King, G.J., Bonnema, G., Tang, H., Wang, H., Belcram, H., Zhou, H., Hirakawa, H., Abe, H., Guo, H., Wang, H., Jin, H., Parkin, I.A., Batley, J., Kim, J.S., Just, J., Li, J., Xu, J., Deng, J., Kim, J.A., Li, J., Yu, J., Meng, J., Wang, J., Min, J., Poulain, J., Wang, J., Hatakeyama, K., Wu, K., Wang, L., Fang, L., Trick, M., Links, M.G., Zhao, M., Jin, M., Ramchiary, N., Drou, N., Berkman, P.J., Cai, Q., Huang, Q., Li, R., Tabata, S., Cheng, S., Zhang, S., Zhang, S., Huang, S., Sato, S., Sun, S., Kwon, S.J., Choi, S.R., Lee, T.H., Fan, W., Zhao, X., Tan, X., Xu, X., Wang, Y., Qiu, Y., Yin, Y., Li, Y., Du, Y., Liao, Y., Lim, Y., Narusaka, Y., Wang, Y., Wang, Z., Li, Z., Wang, Z., Xiong, Z., Zhang, Z., Brassica rapa Genome Sequencing Project, C. (2011) The genome of the mesopolyploid crop species *Brassica rapa*. *Nat Genet* 43: 1035-1039

Google Scholar: [Author Only](#) [Title Only](#) [Author and Title](#)

Wei, Y., Li, G., Zhang, S., Zhang, S., Zhang, H., Sun, R., Zhang, R., Li, F. (2021) Analysis of transcriptional changes in different *Brassica napus* synthetic allopolyploids. *Genes* 12

Google Scholar: [Author Only](#) [Title Only](#) [Author and Title](#)

Wendel, J.F. (2000) Genome evolution in polyploids. *Plant Mol Biol* 42: 225-249

Google Scholar: [Author Only](#) [Title Only](#) [Author and Title](#)

Wendel, J.F. (2015) The wondrous cycles of polyploidy in plants. *Am J Bot* 102: 1753-1756

Google Scholar: [Author Only](#) [Title Only](#) [Author and Title](#)

Wendel, J.F., Jackson, S.A., Meyers, B.C., Wing, R.A. (2016) Evolution of plant genome architecture. *Genome Biol* 17: 37

Google Scholar: [Author Only](#) [Title Only](#) [Author and Title](#)

Xiong, Z., Gaeta, R.T., Pires, J.C. (2011) Homoeologous shuffling and chromosome compensation maintain genome balance in resynthesized allopolyploid *Brassica napus*. *Proc Natl Acad Sci USA* 108: 7908-7913

Google Scholar: [Author Only](#) [Title Only](#) [Author and Title](#)

Yang, X.Z., Li, L. (2011) miRDeep-P: a computational tool for analyzing the microRNA transcriptome in plants. *Bioinformatics* 27: 2614-2615

Google Scholar: [Author Only](#) [Title Only](#) [Author and Title](#)

Yoo, M.J., Liu, X., Pires, J.C., Soltis, P.S., Soltis, D.E. (2014) Nonadditive gene expression in polyploids. *Annu Rev Genet* 48: 485-517

Google Scholar: [Author Only](#) [Title Only](#) [Author and Title](#)

Zang, C.Z., Schones, D.E., Zeng, C., Cui, K.R., Zhao, K.J., Peng, W.Q. (2009) A clustering approach for identification of enriched domains from histone modification ChIP-Seq data. *Bioinformatics* 25: 1952-1958

Google Scholar: [Author Only](#) [Title Only](#) [Author and Title](#)

Zhang, H., Bian, Y., Gou, X., Zhu, B., Xu, C., Qi, B., Li, N., Rustgi, S., Zhou, H., Han, F., Jiang, J., von Wettstein, D., Liu, B. (2013) Persistent whole-chromosome aneuploidy is generally associated with nascent allohexaploid wheat. *Proc Natl Acad Sci USA* 110: 3447-3452

Google Scholar: [Author Only](#) [Title Only](#) [Author and Title](#)

Zhong, S., Joung, J.G., Zheng, Y., Chen, Y.R., Liu, B., Shao, Y., Xiang, J.Z., Fei, Z., Giovannoni, J.J. (2011) High-throughput illumina strand-specific RNA sequencing library preparation. *Cold Spring Harb Protoc* 2011: 940-949

Google Scholar: [Author Only](#) [Title Only](#) [Author and Title](#)
